# Supplementary material for: Aspergixanthones I–K, New Anti-Vibrio Prenylxanthones from the Marine-Derived Fungus Aspergillus sp. ZA-01
Source: MDPI journal article supplement (doi:10.3390/md16090312), 2018-09-04
Supplement: s1 [file s1]

## List of Supporting Information

- Figure S1.**  $^1\text{H}$  NMR (600 MHz,  $\text{CDCl}_3$ ) spectrum of compound **1**
- Figure S2.**  $^{13}\text{C}$  NMR (150 MHz,  $\text{CDCl}_3$ ) spectrum of compound **1**
- Figure S3.** HSQC ( $\text{CDCl}_3$ ) spectrum of compound **1**
- Figure S4.**  $^1\text{H}$ - $^1\text{H}$  COSY ( $\text{CDCl}_3$ ) spectrum of compound **1**
- Figure S5.** HMBC ( $\text{CDCl}_3$ ) spectrum of compound **1**
- Figure S6.** NOESY ( $\text{CDCl}_3$ ) spectrum of compound **1**
- Figure S7.** HRESIMS spectrum of compound **1**
- Figure S8.**  $^1\text{H}$  NMR (600 MHz,  $\text{CDCl}_3$ ) spectrum of compound **1a**
- Figure S9.**  $^{13}\text{C}$  NMR (150 MHz,  $\text{CDCl}_3$ ) spectrum of compound **1a**
- Figure S10.** HRESIMS spectrum of compound **1a**
- Figure S11.**  $^1\text{H}$  NMR (600 MHz,  $\text{CDCl}_3$ ) spectrum of compound **2**
- Figure S12.**  $^{13}\text{C}$  NMR (150 MHz,  $\text{CDCl}_3$ ) spectrum of compound **2**
- Figure S13.** HSQC ( $\text{CDCl}_3$ ) spectrum of compound **2**
- Figure S14.**  $^1\text{H}$ - $^1\text{H}$  COSY ( $\text{CDCl}_3$ ) spectrum of compound **2**
- Figure S15.** HMBC ( $\text{CDCl}_3$ ) spectrum of compound **2**
- Figure S16.** NOESY ( $\text{CDCl}_3$ ) spectrum of compound **2**
- Figure S17.** HRESIMS spectrum of compound **2**
- Figure S18.**  $^1\text{H}$  NMR (600 MHz,  $\text{CDCl}_3$ ) spectrum of compound **3**
- Figure S19.**  $^{13}\text{C}$  NMR (150 MHz,  $\text{CDCl}_3$ ) spectrum of compound **3**
- Figure S20.** HSQC ( $\text{CDCl}_3$ ) spectrum of compound **3**
- Figure S21.**  $^1\text{H}$ - $^1\text{H}$  COSY ( $\text{CDCl}_3$ ) spectrum of compound **3**
- Figure S22.** HMBC ( $\text{CDCl}_3$ ) spectrum of compound **3**
- Figure S23.** NOESY ( $\text{CDCl}_3$ ) spectrum of compound **3**
- Figure S24.** HRESIMS spectrum of compound **3**

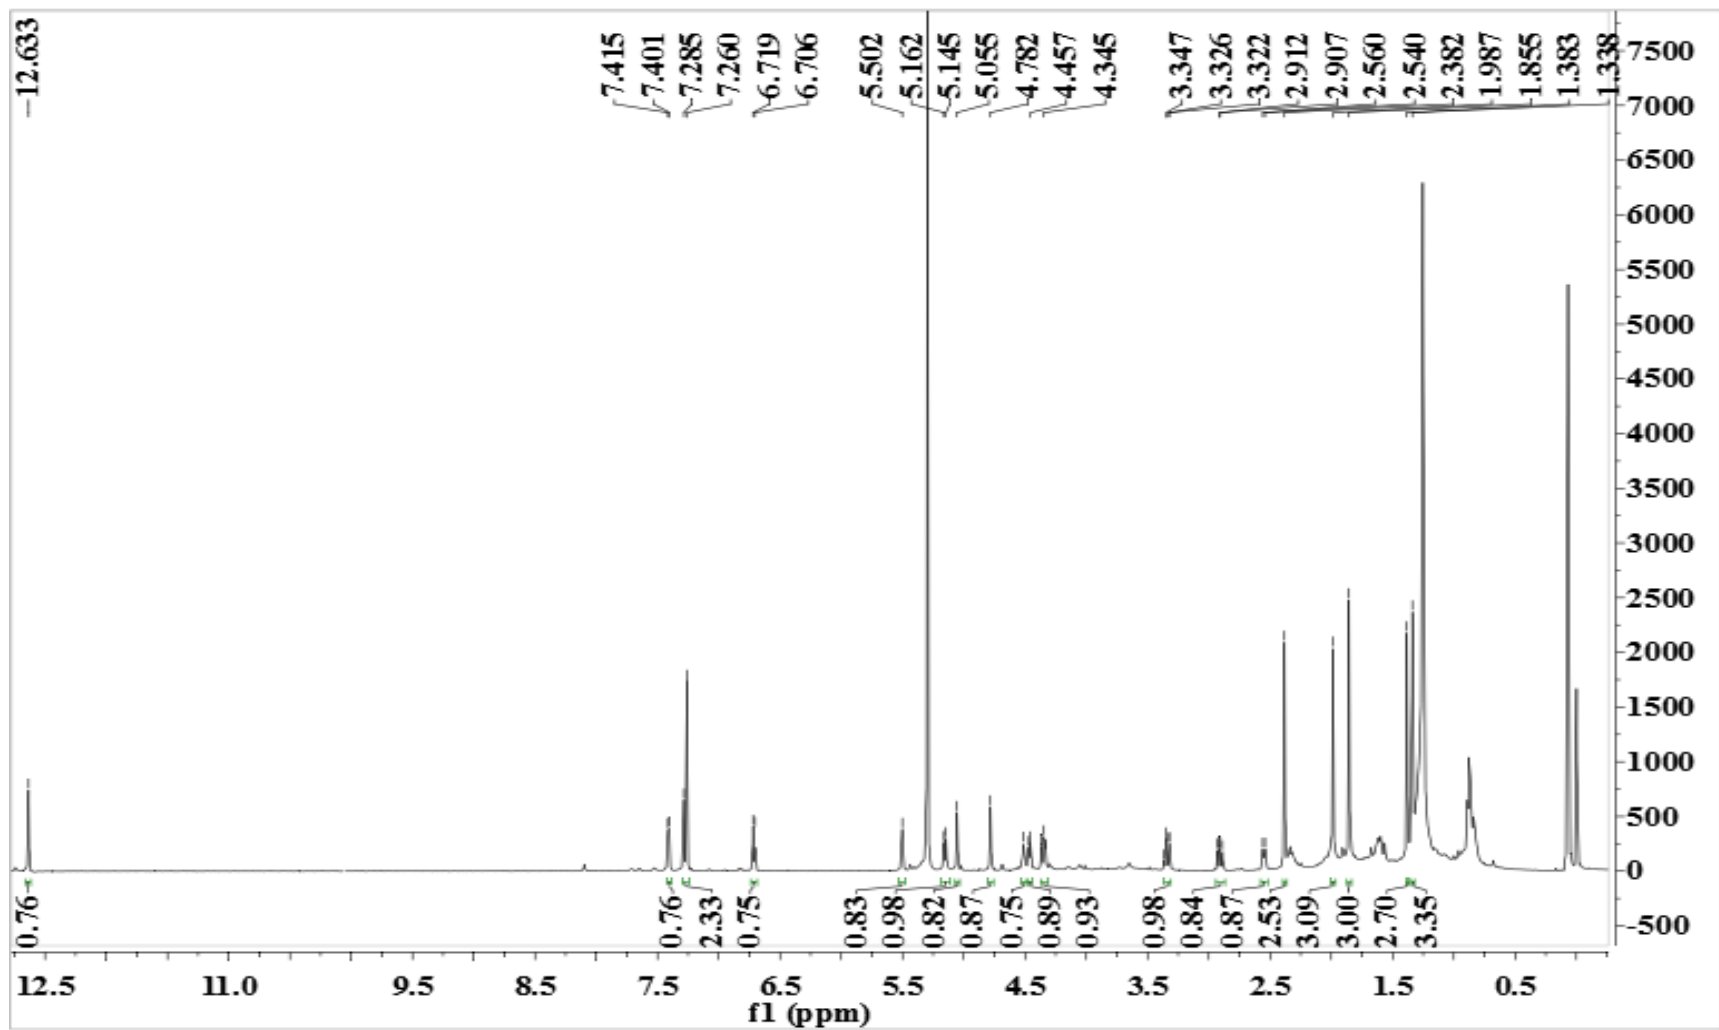

Figure S1. <sup>1</sup>H NMR (600 MHz, CDCl<sub>3</sub>) spectrum of compound 1

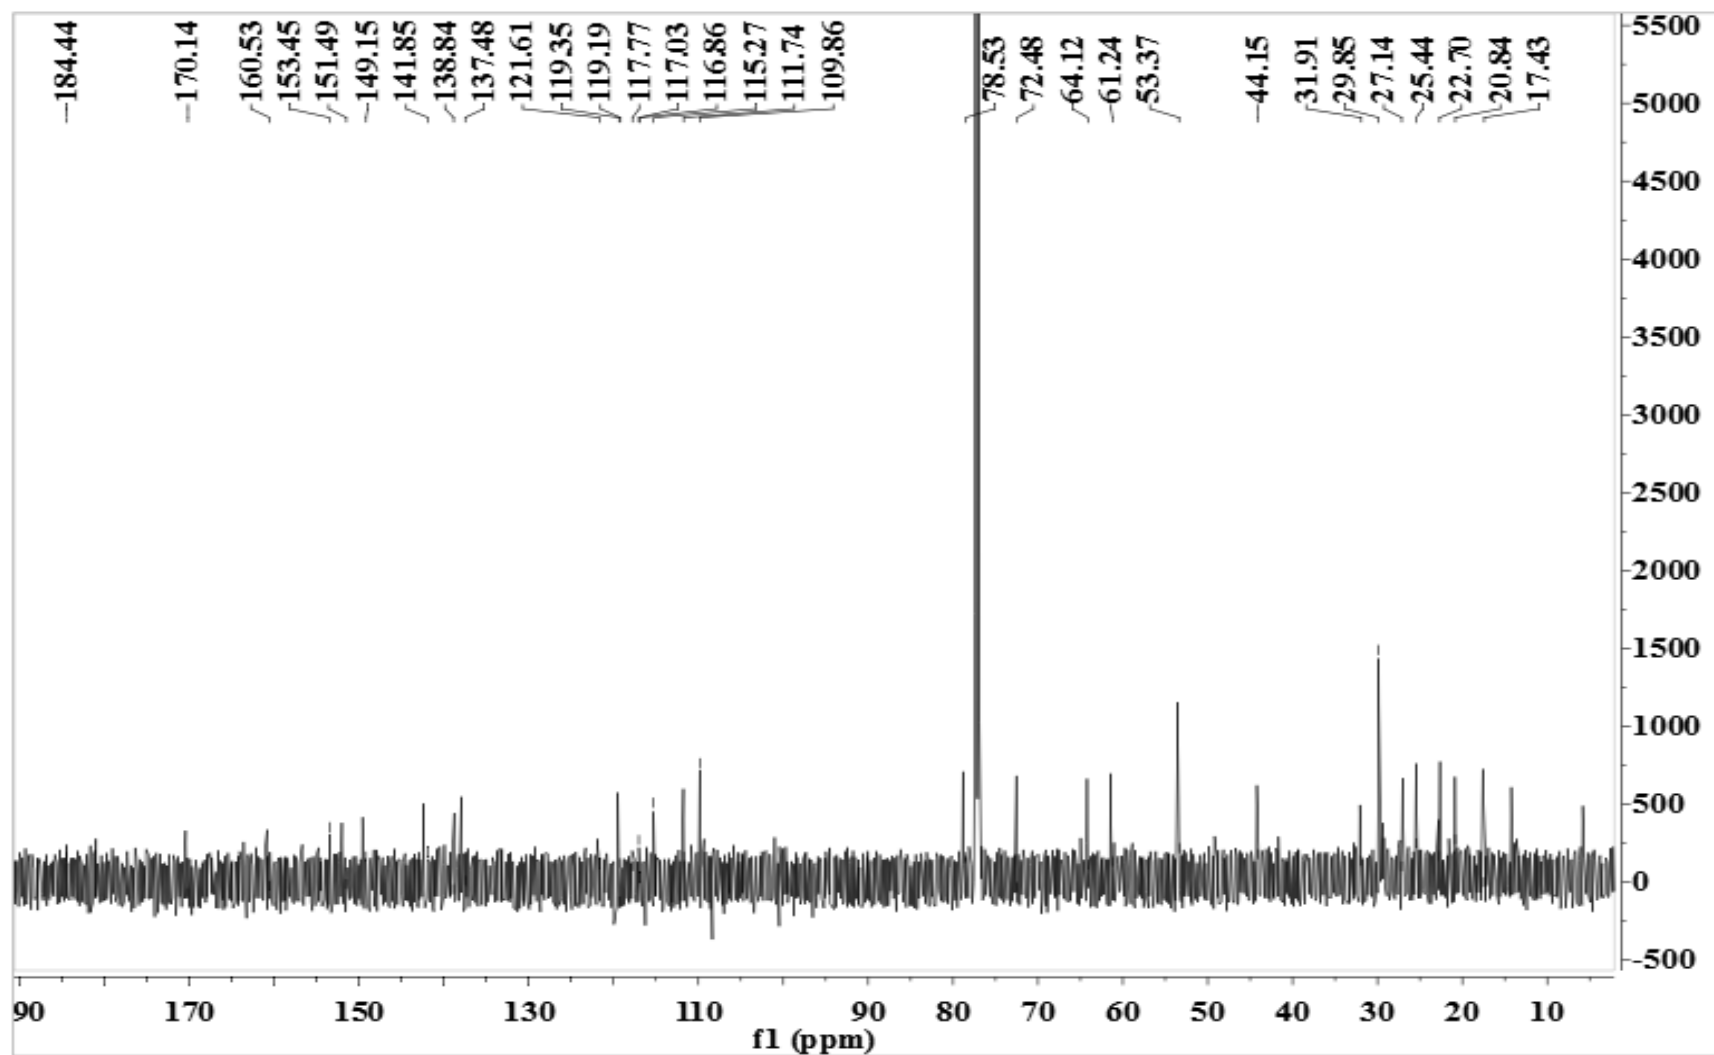

Figure S2.  $^{13}\text{C}$  NMR (150 MHz,  $\text{CDCl}_3$ ) spectrum of compound **1**

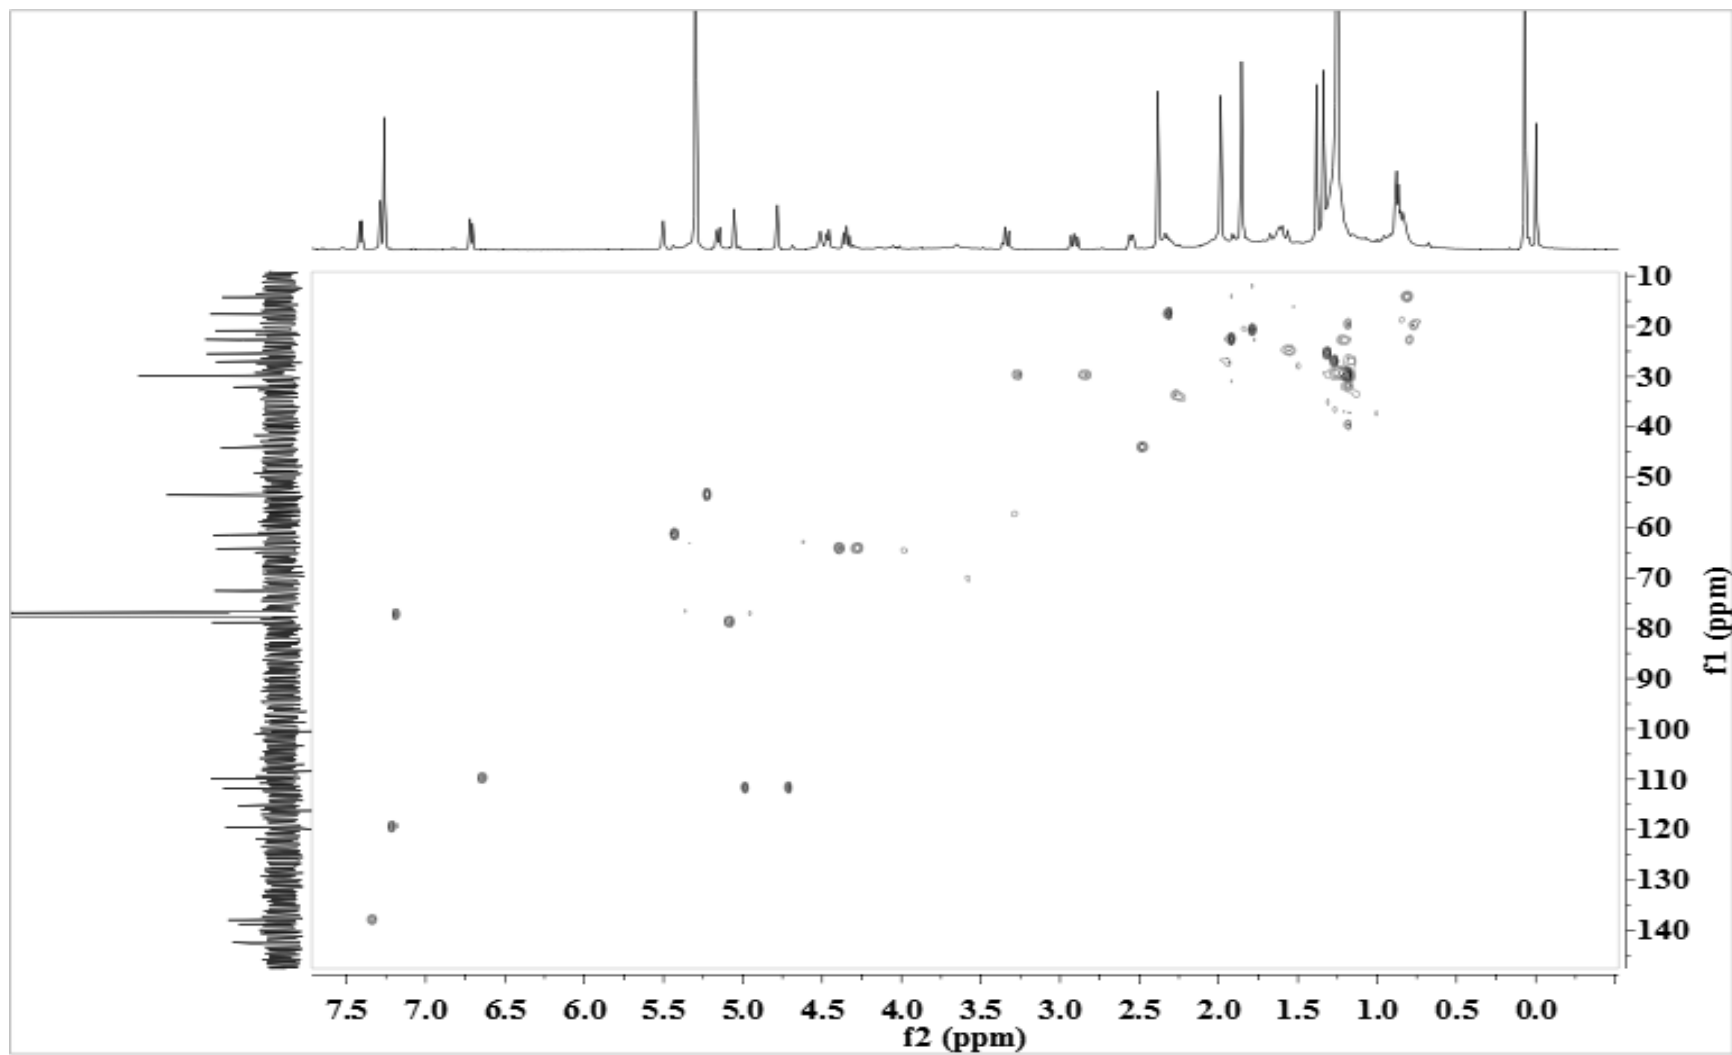

**Figure S3.** HSQC (CDCl<sub>3</sub>) spectrum of compound 1

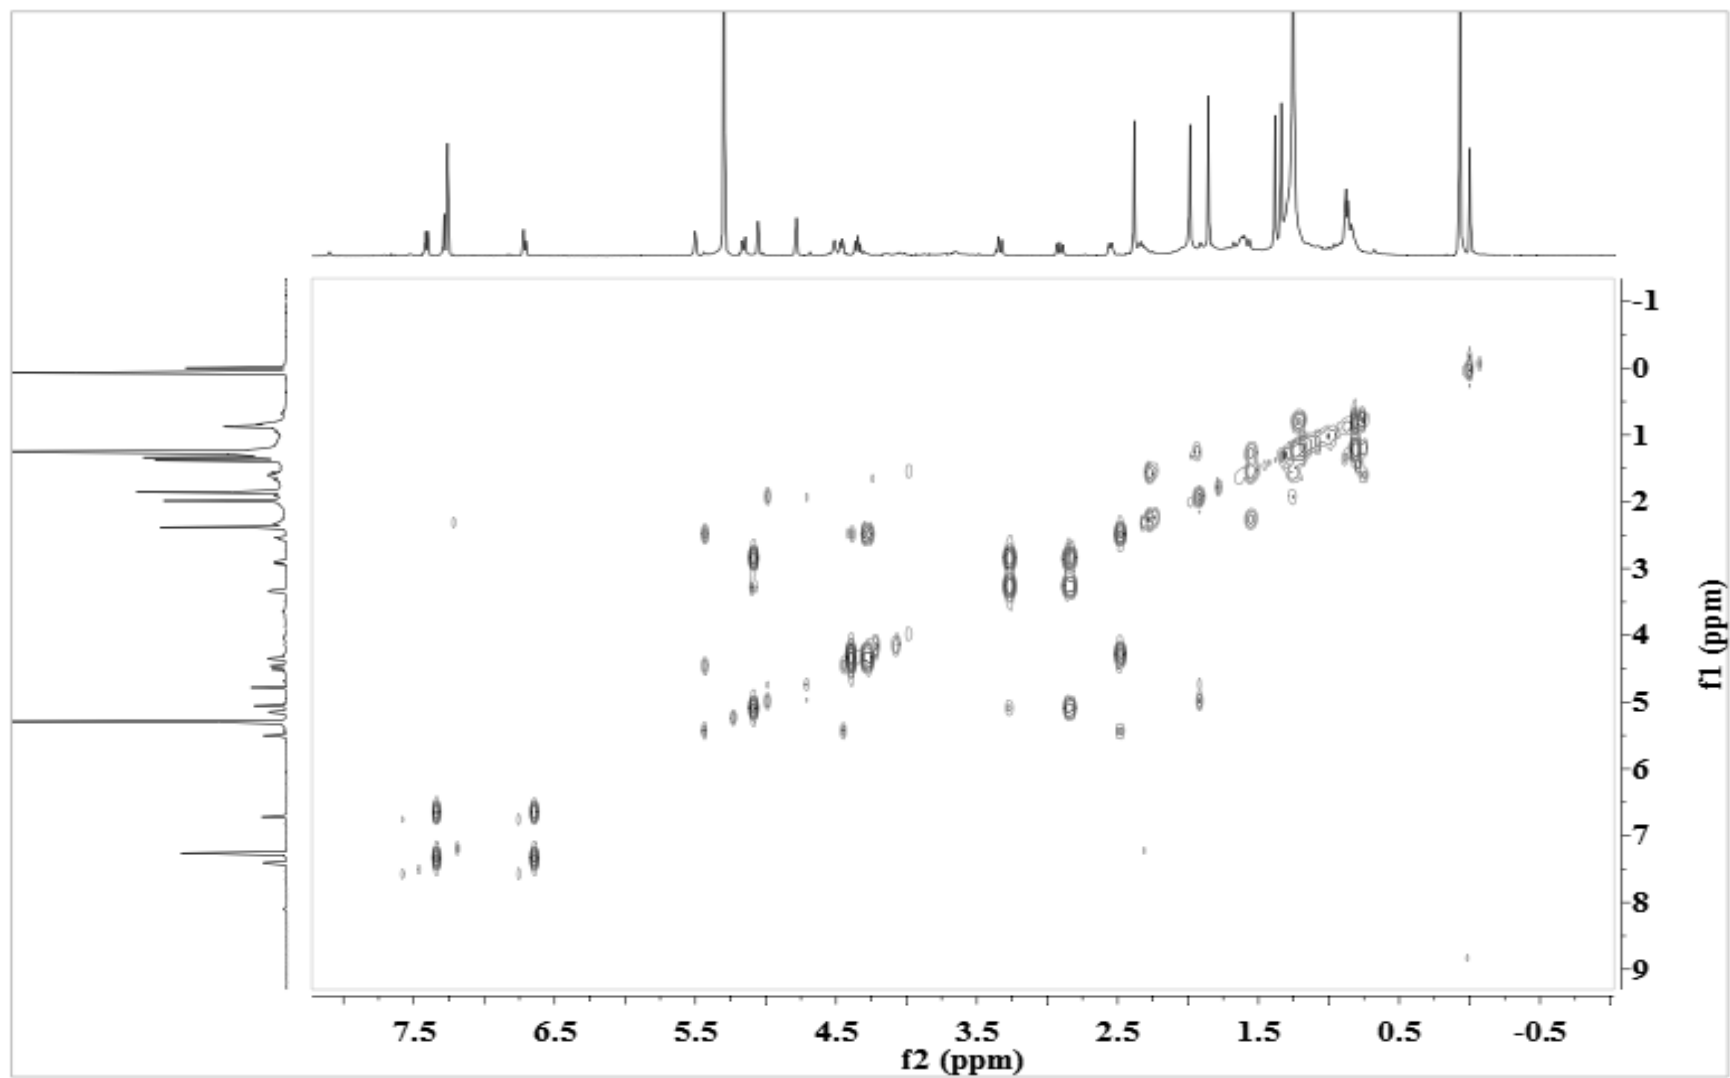

**Figure S4.**  $^1\text{H}$ - $^1\text{H}$  COSY ( $\text{CDCl}_3$ ) spectrum of compound **1**

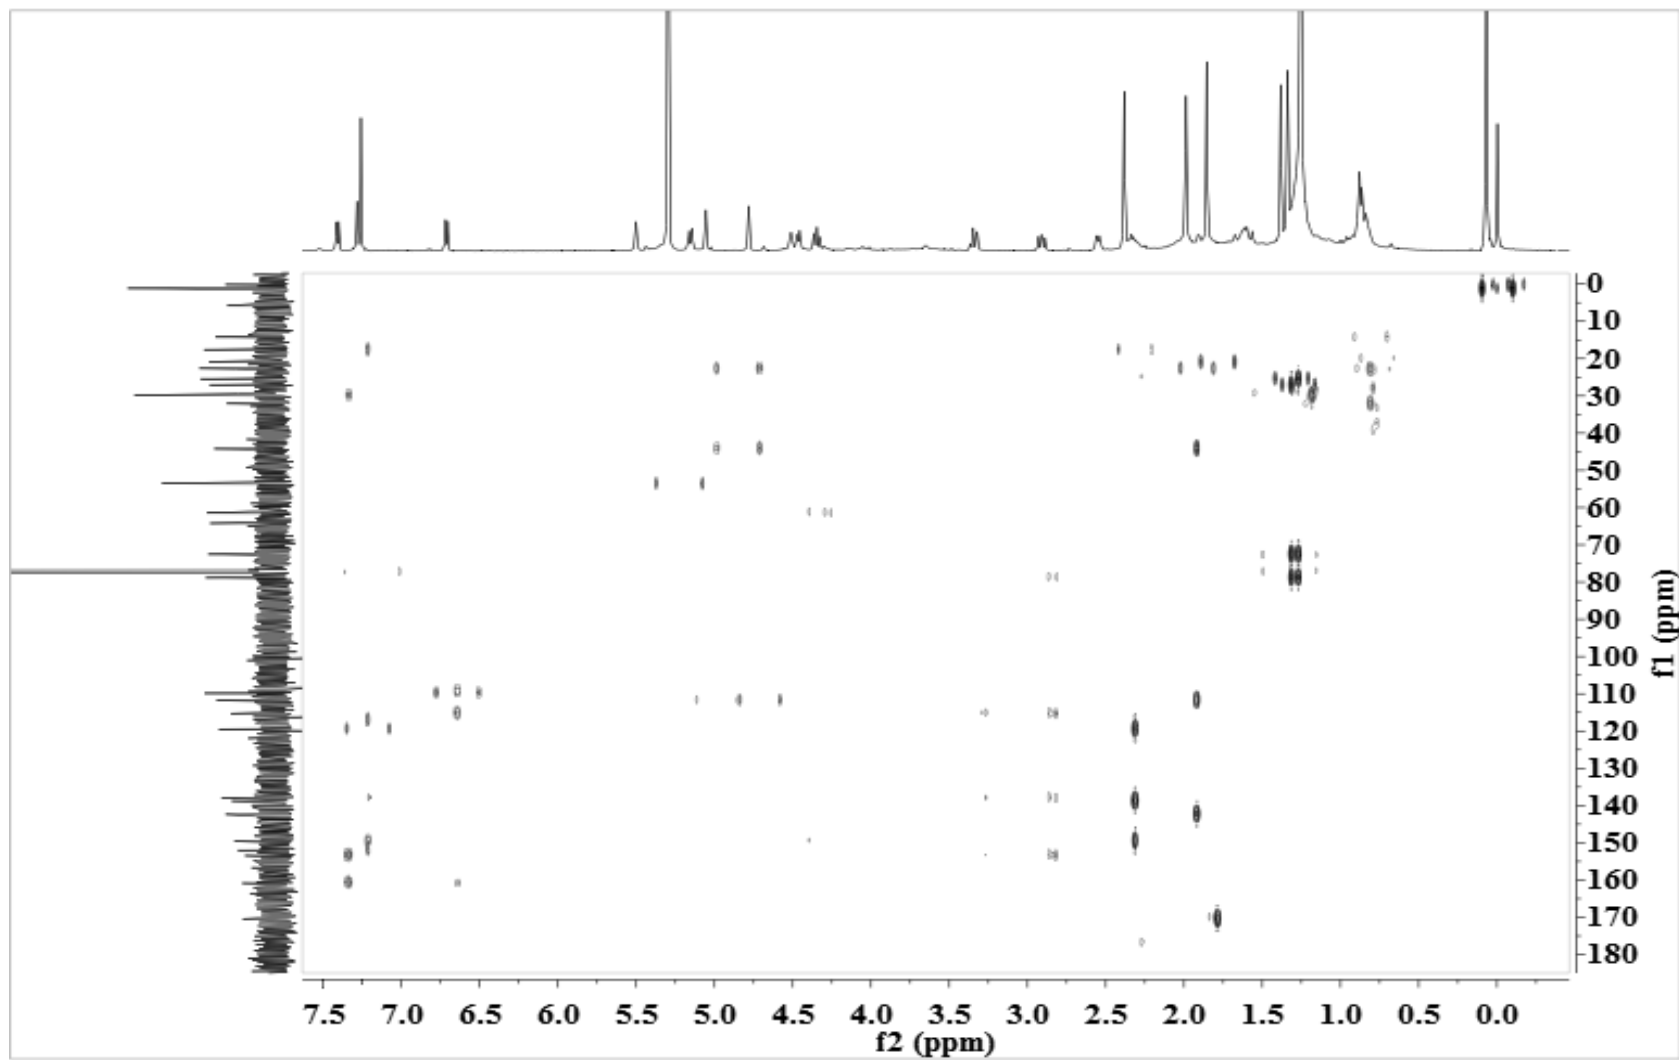

**Figure S5.** HMBC (CDCl<sub>3</sub>) spectrum of compound **1**

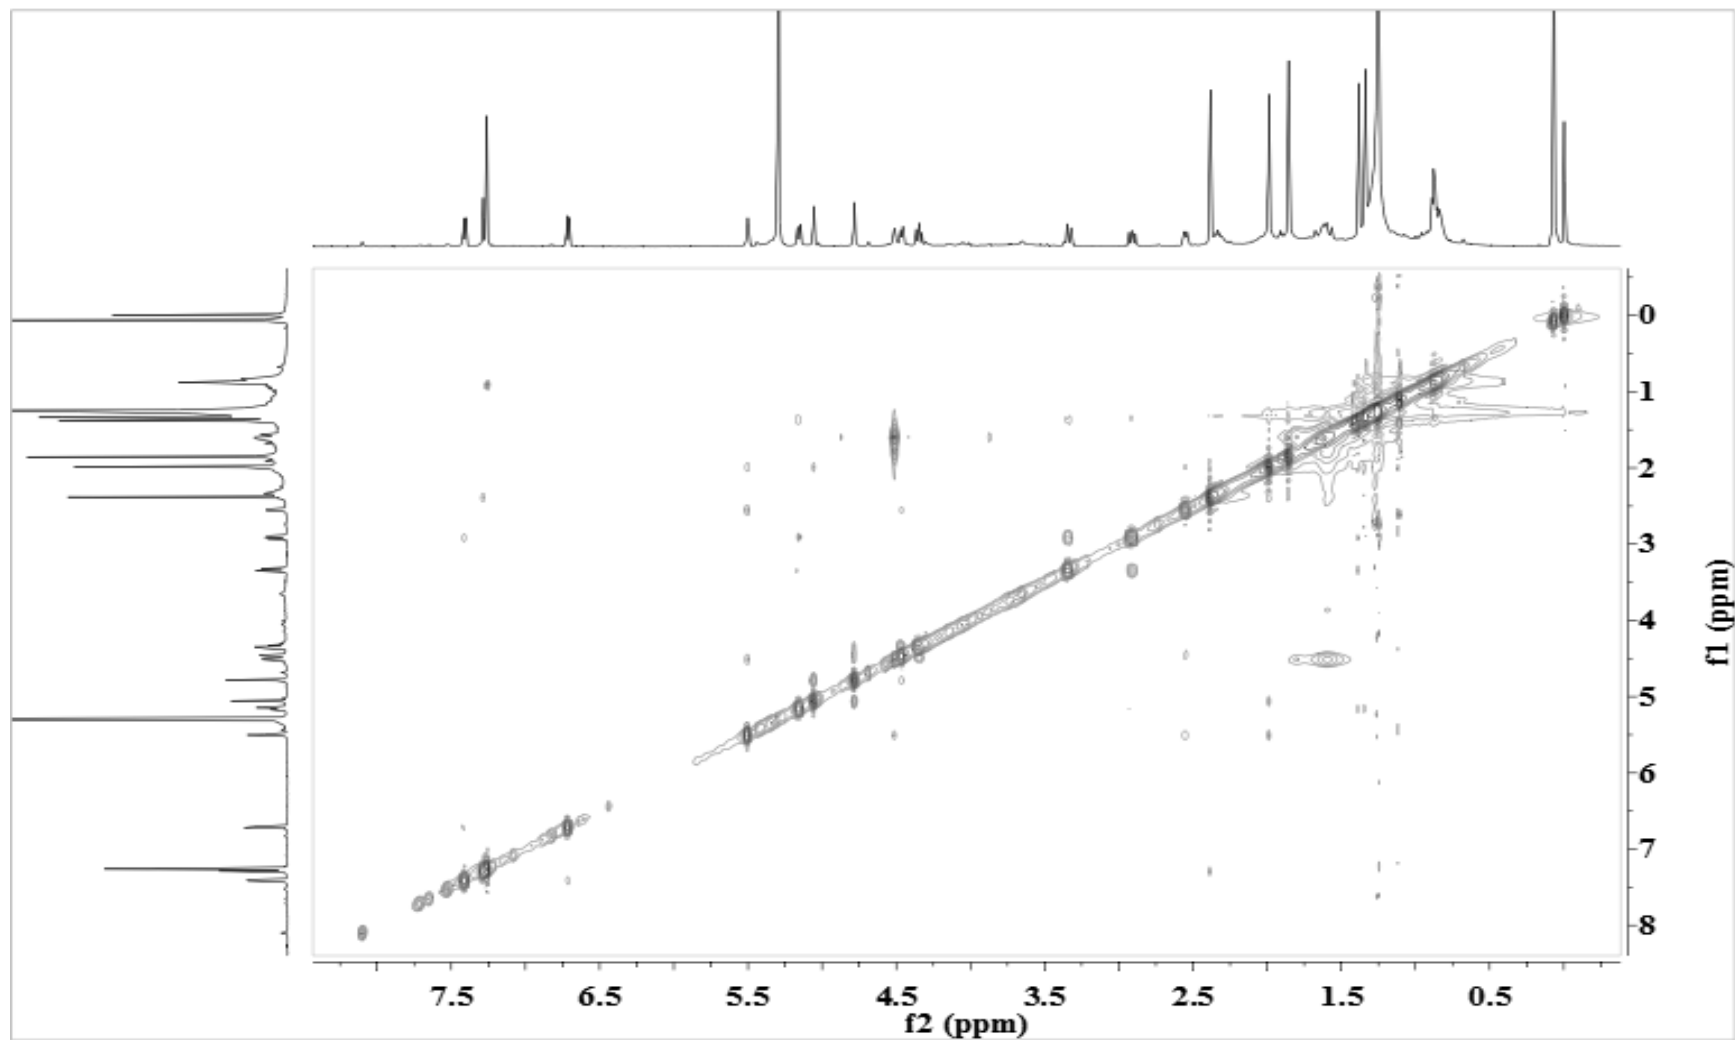

**Figure S6.** NOESY (CDCl<sub>3</sub>) spectrum of compound **1**

20171121-ZA-15\_171116093616 #108-110 RT: 1.08-1.10 AV: 3 SB: 35 0.02-0.33 NL: 3.88E5  
T: FTMS + p ESI Full ms [100.00-2000.00]

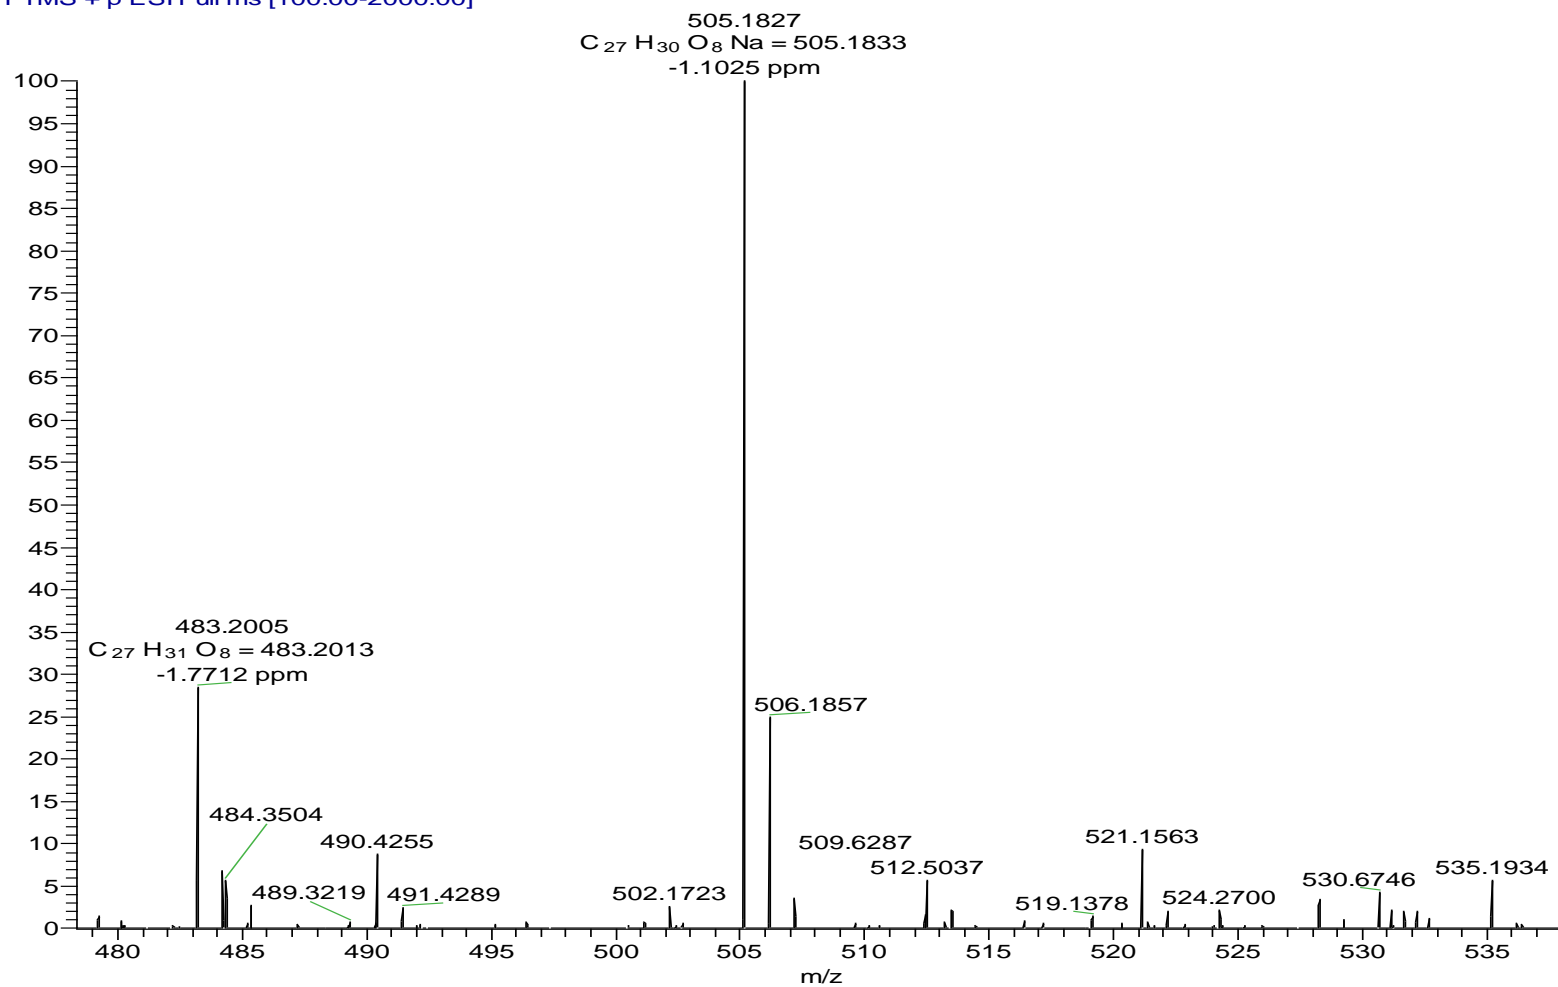

Figure S7. HRESIMS spectrum of compound 1



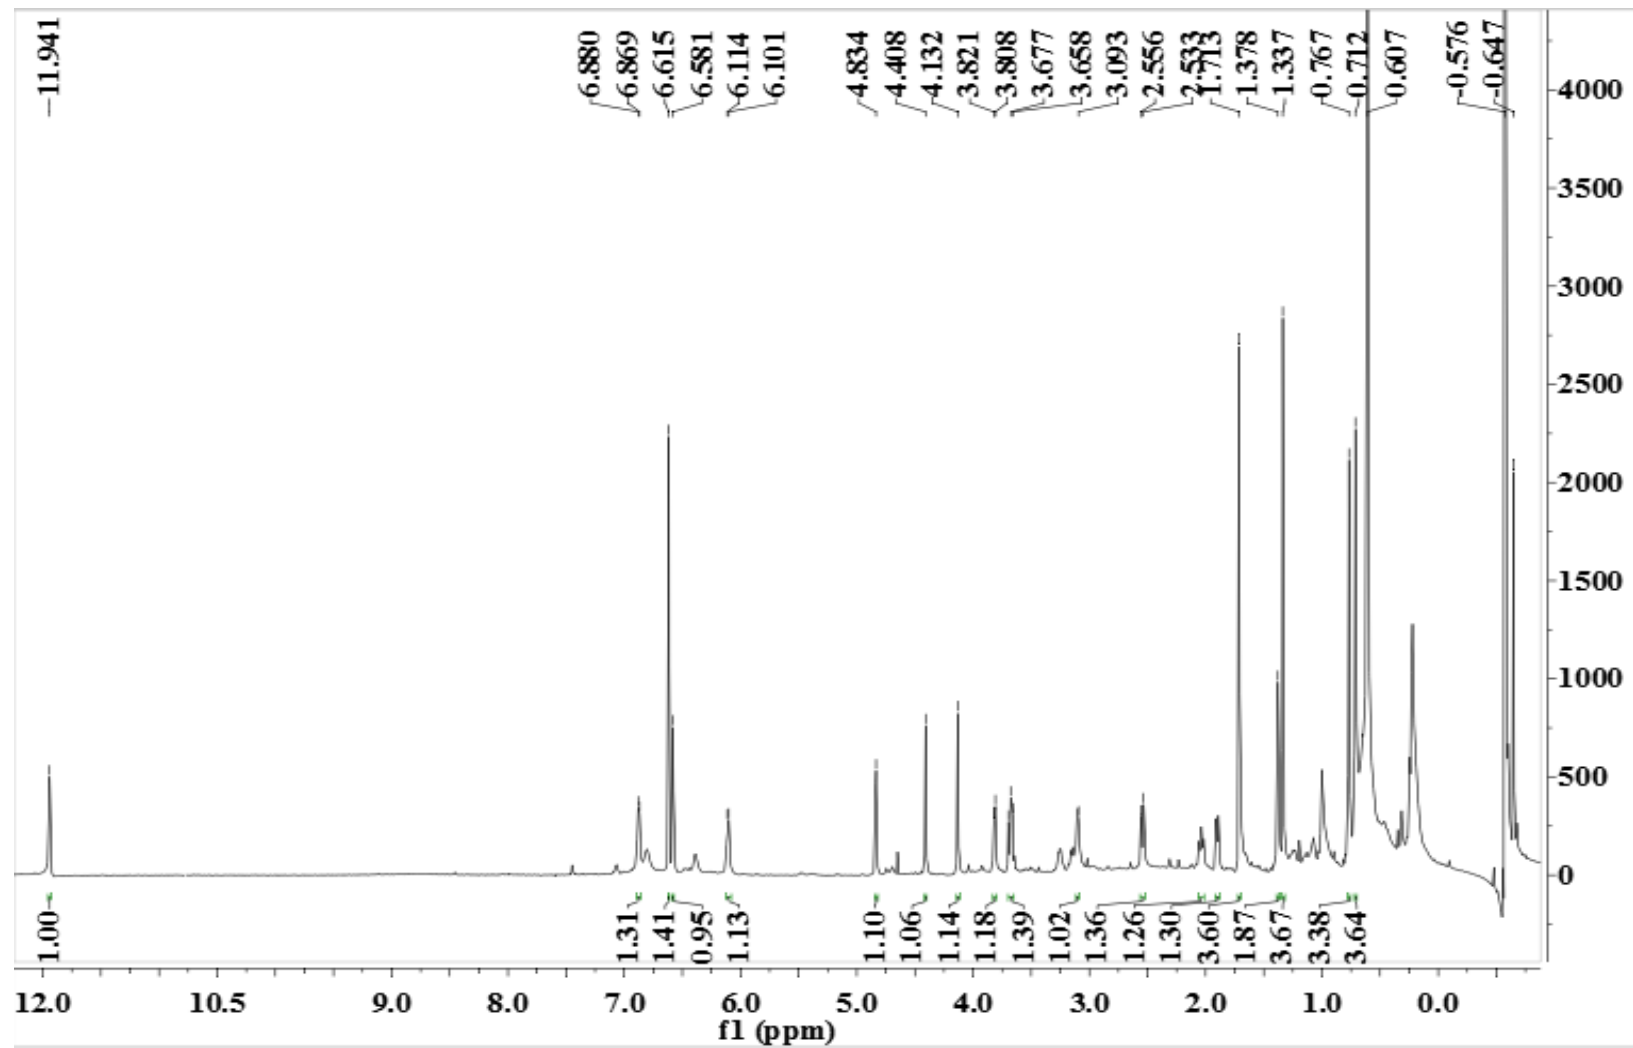

Figure S8. <sup>1</sup>H NMR (600 MHz, CDCl<sub>3</sub>) spectrum of compound 1a

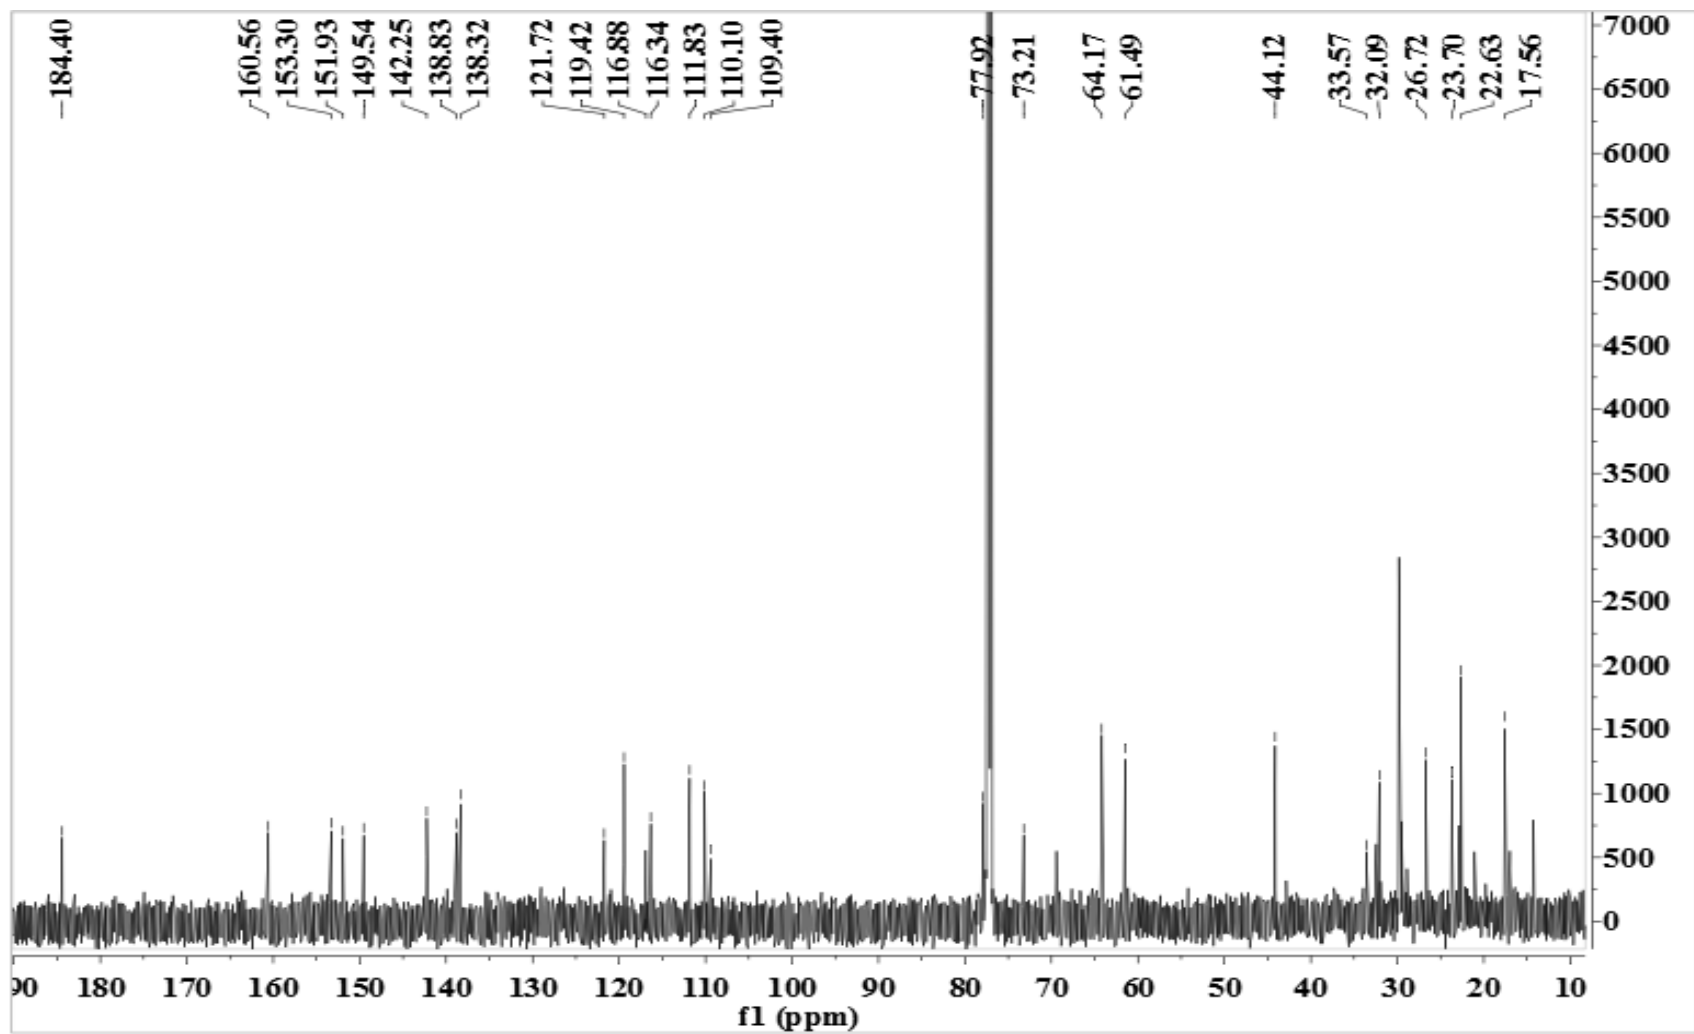

Figure S9. <sup>13</sup>C NMR (150 MHz, CDCl<sub>3</sub>) spectrum of compound 1a

20171121-ZA-14\_171116093616 #68-69 RT: 0.64-0.65 AV: 2 NL: 7.10E5  
T: FTMS + p ESI Full ms [150.00-1000.00]

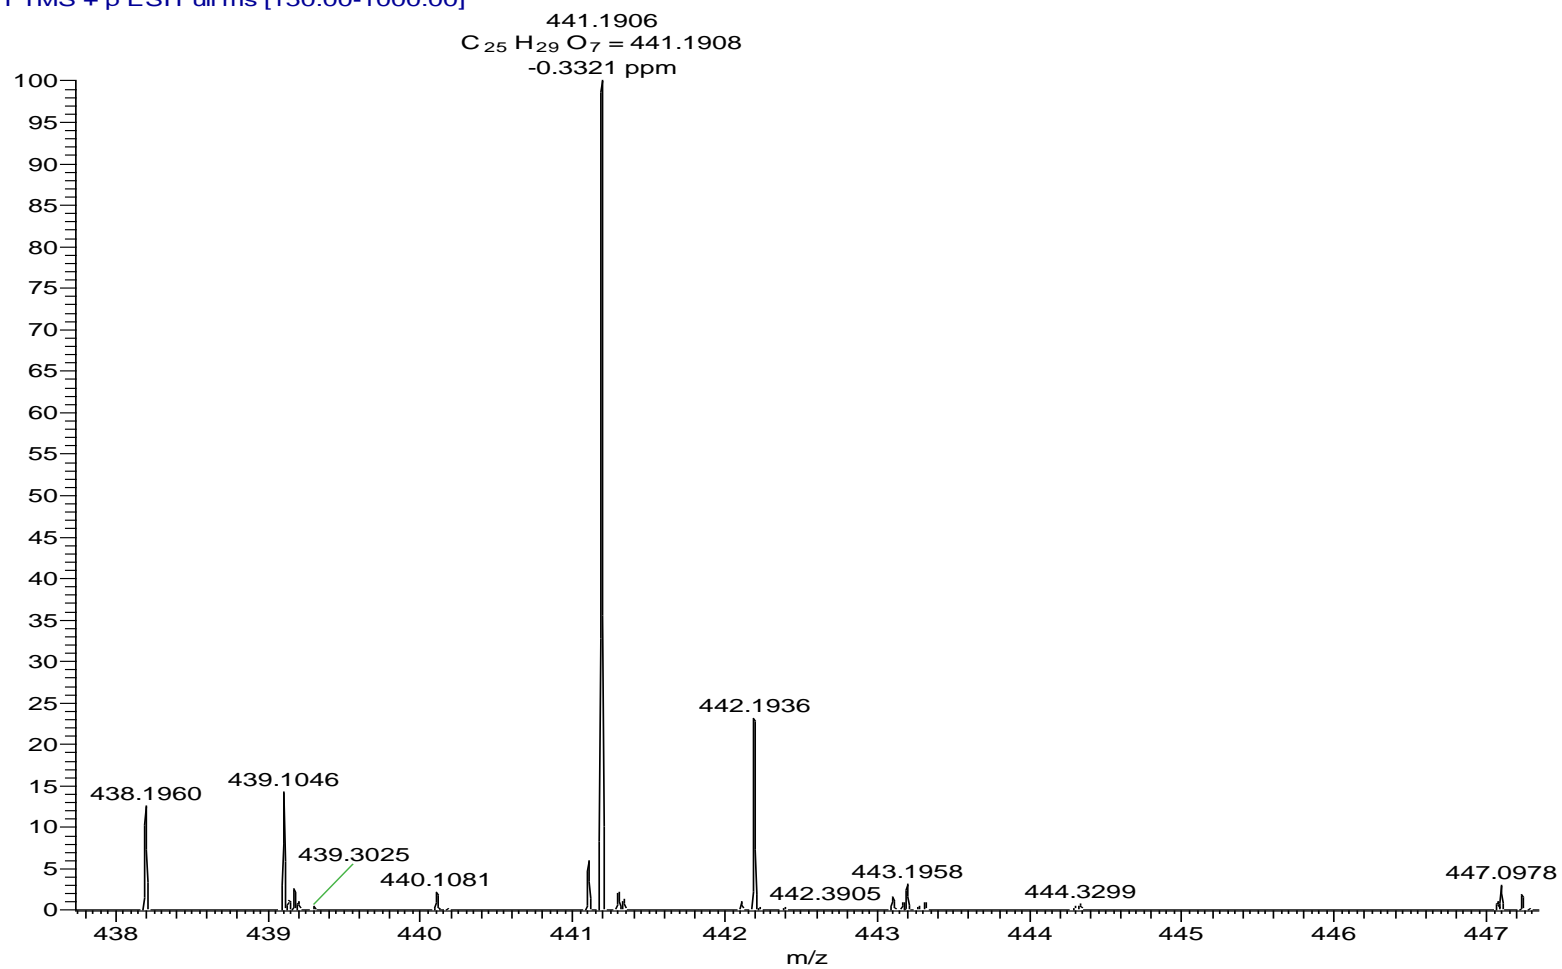

Figure S10. HRESIMS spectrum of compound 1a

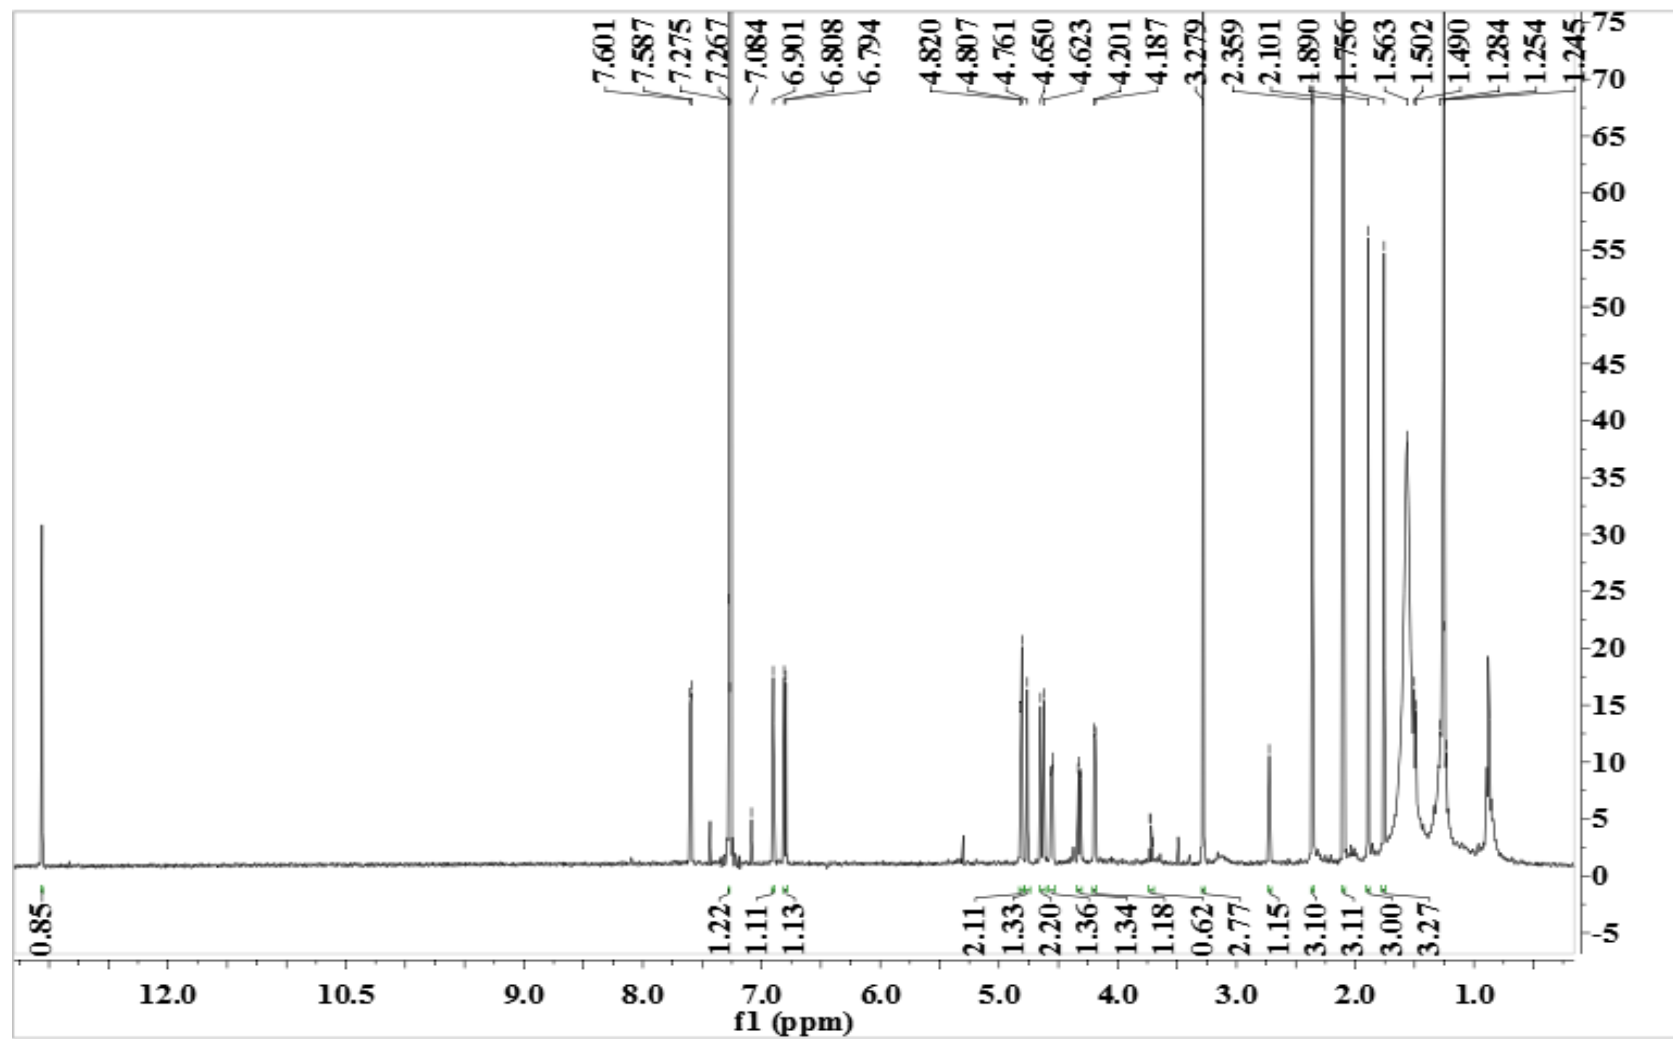

Figure S11. <sup>1</sup>H NMR (600 MHz, CDCl<sub>3</sub>) spectrum of compound 2

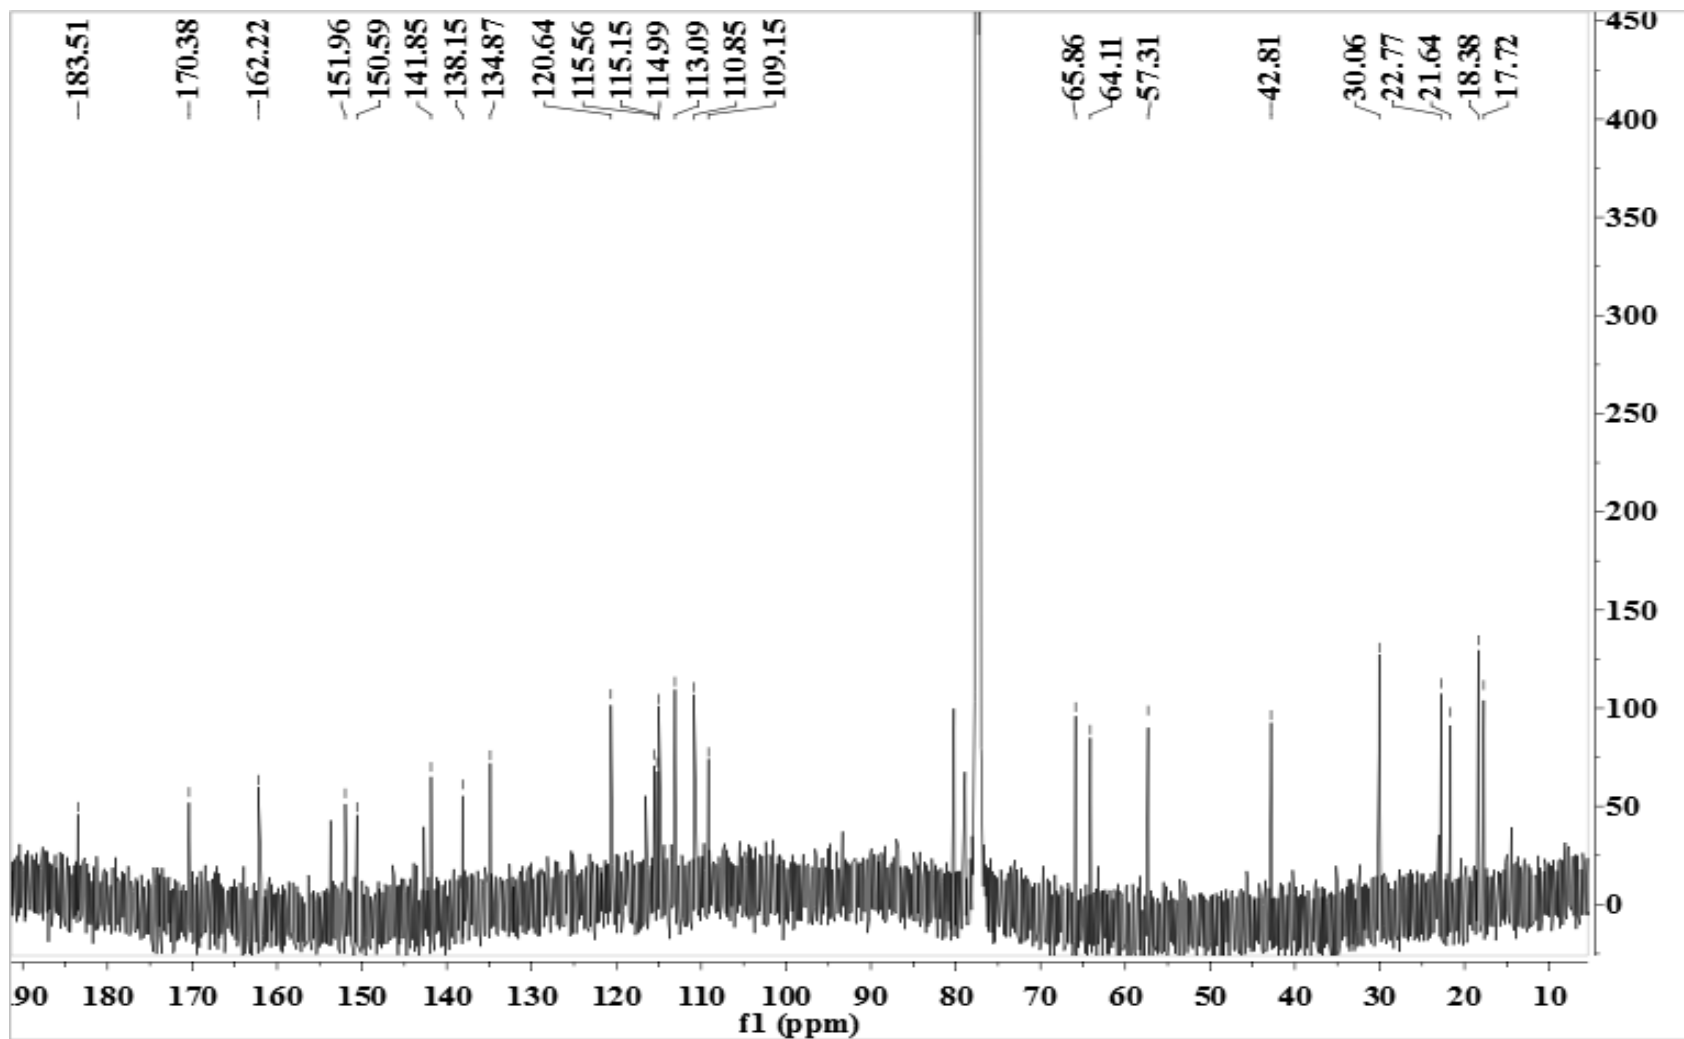

Figure S12. <sup>13</sup>C NMR (150 MHz, CDCl<sub>3</sub>) spectrum of compound 2

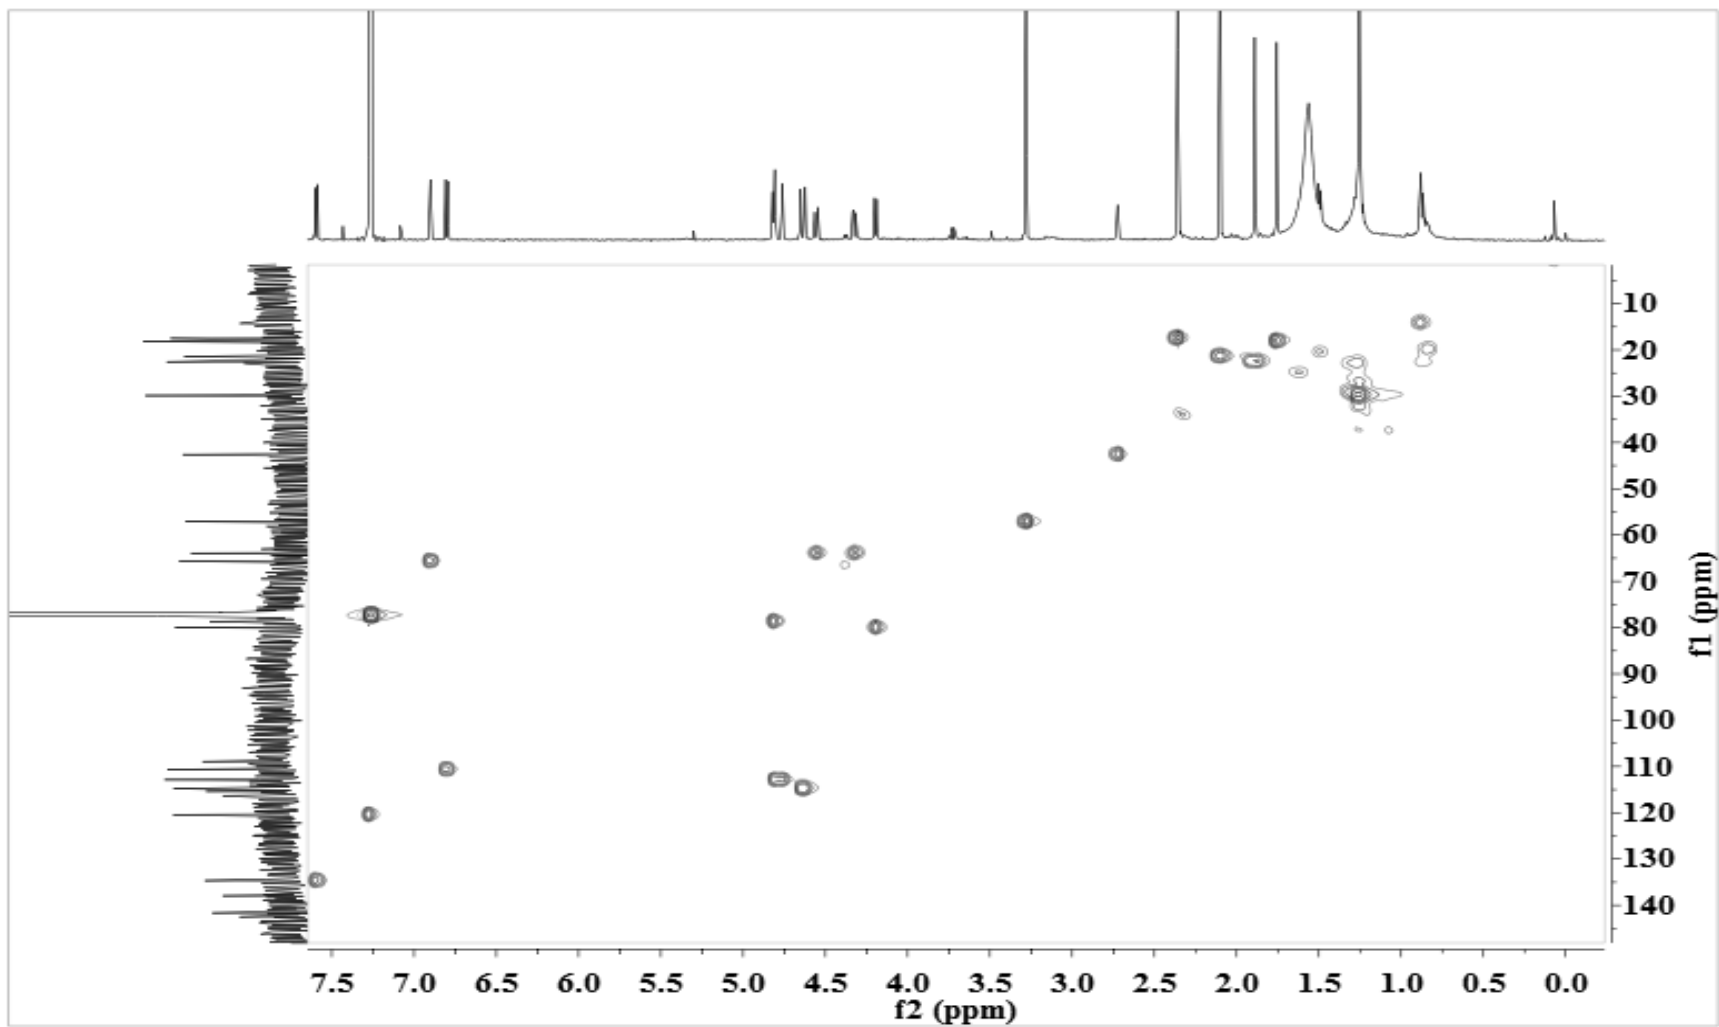

**Figure S13.** HSQC (CDCl<sub>3</sub>) spectrum of compound 2

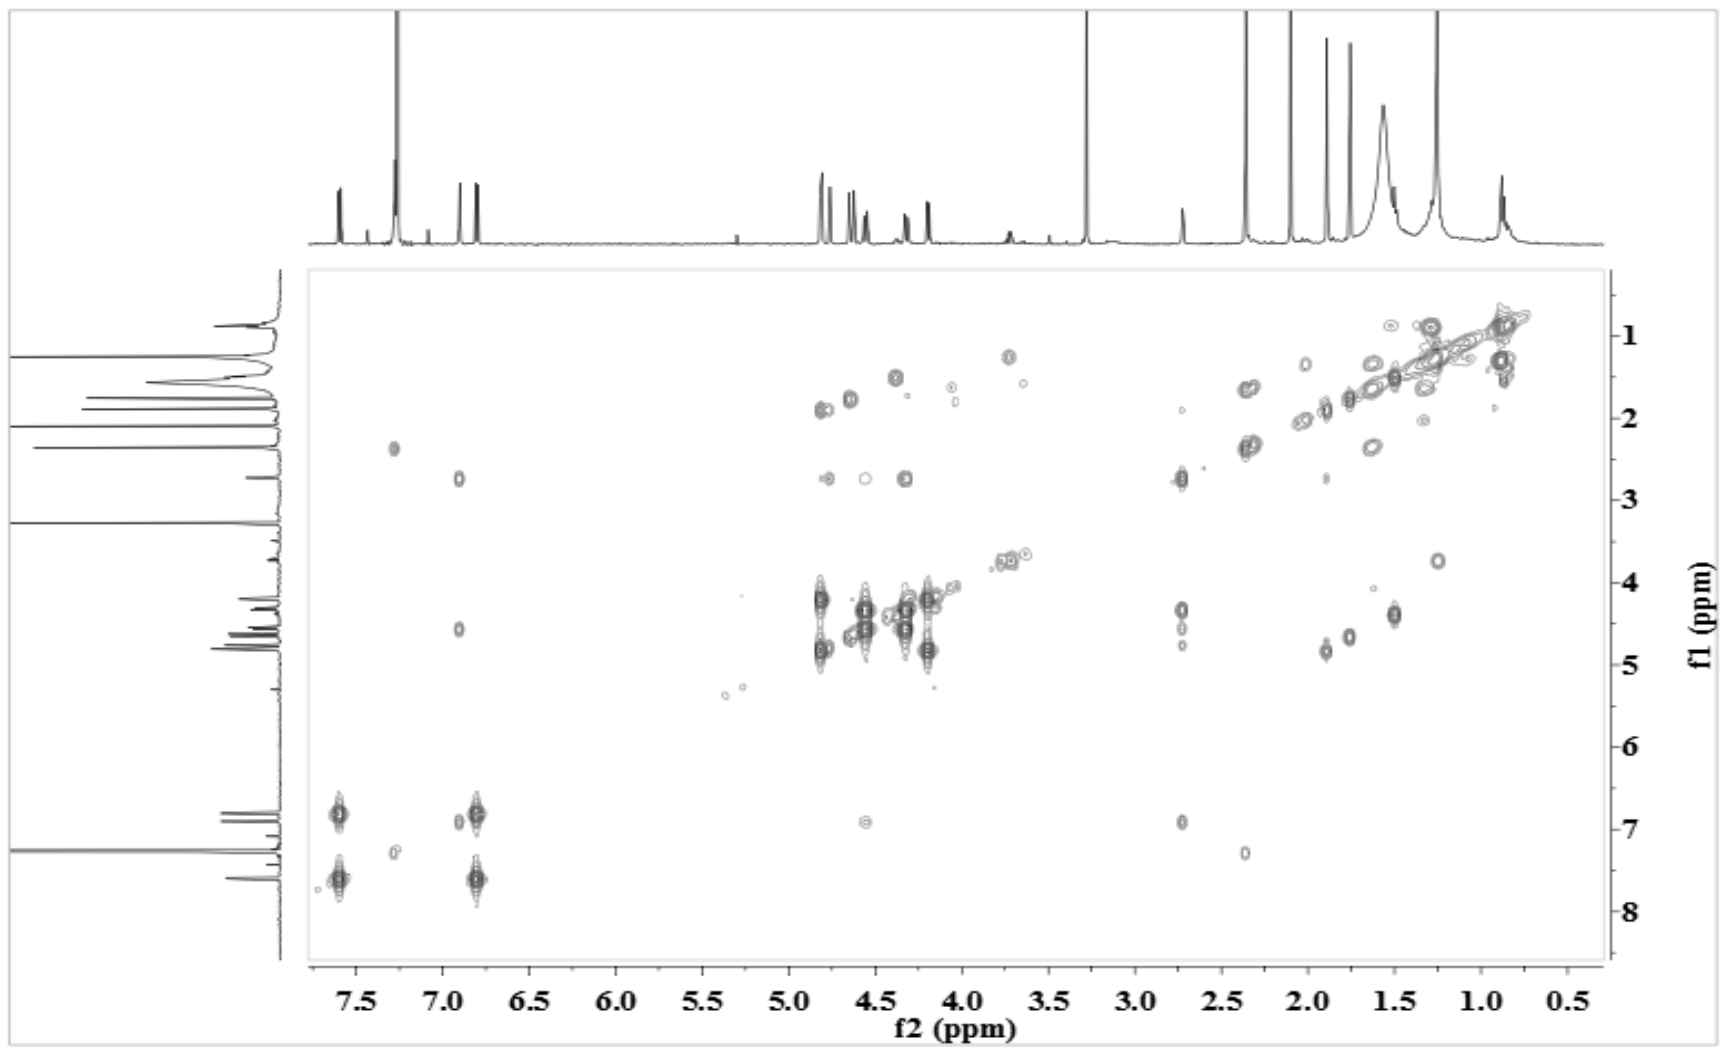

**Figure S14.**  $^1\text{H}$ - $^1\text{H}$  COSY ( $\text{CDCl}_3$ ) spectrum of compound 2

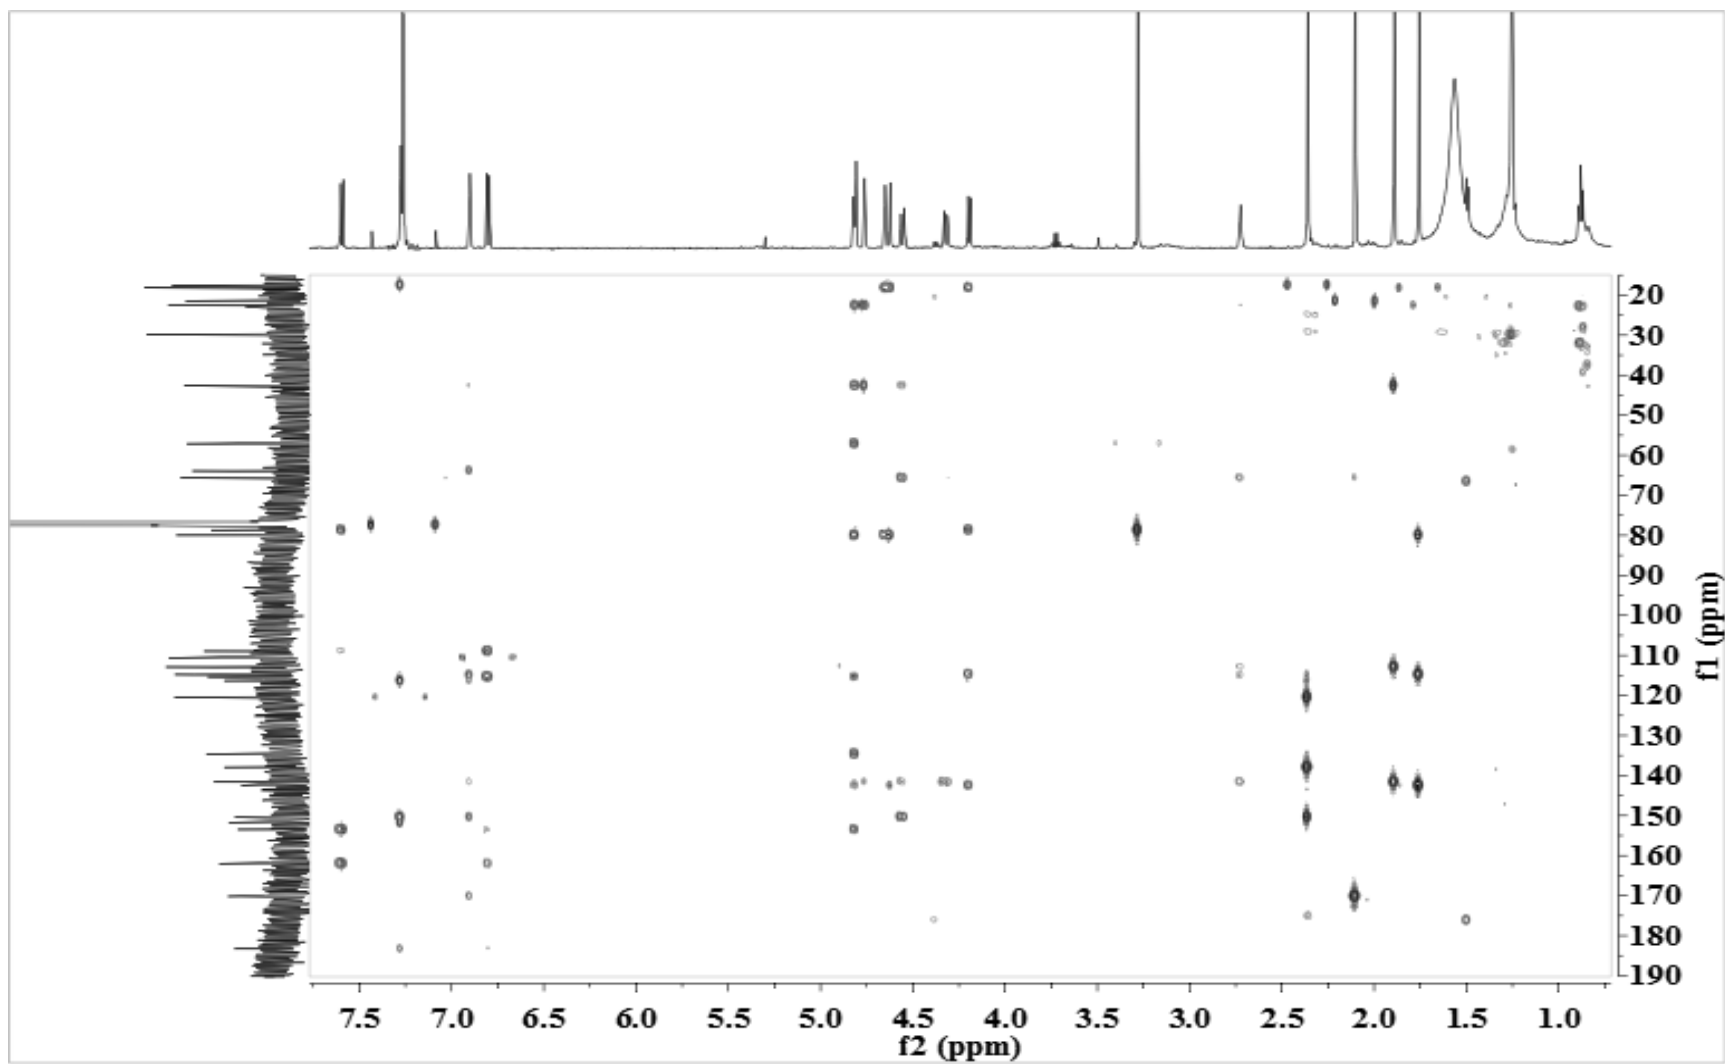

**Figure S15.** HMBC (CDCl<sub>3</sub>) spectrum of compound **2**





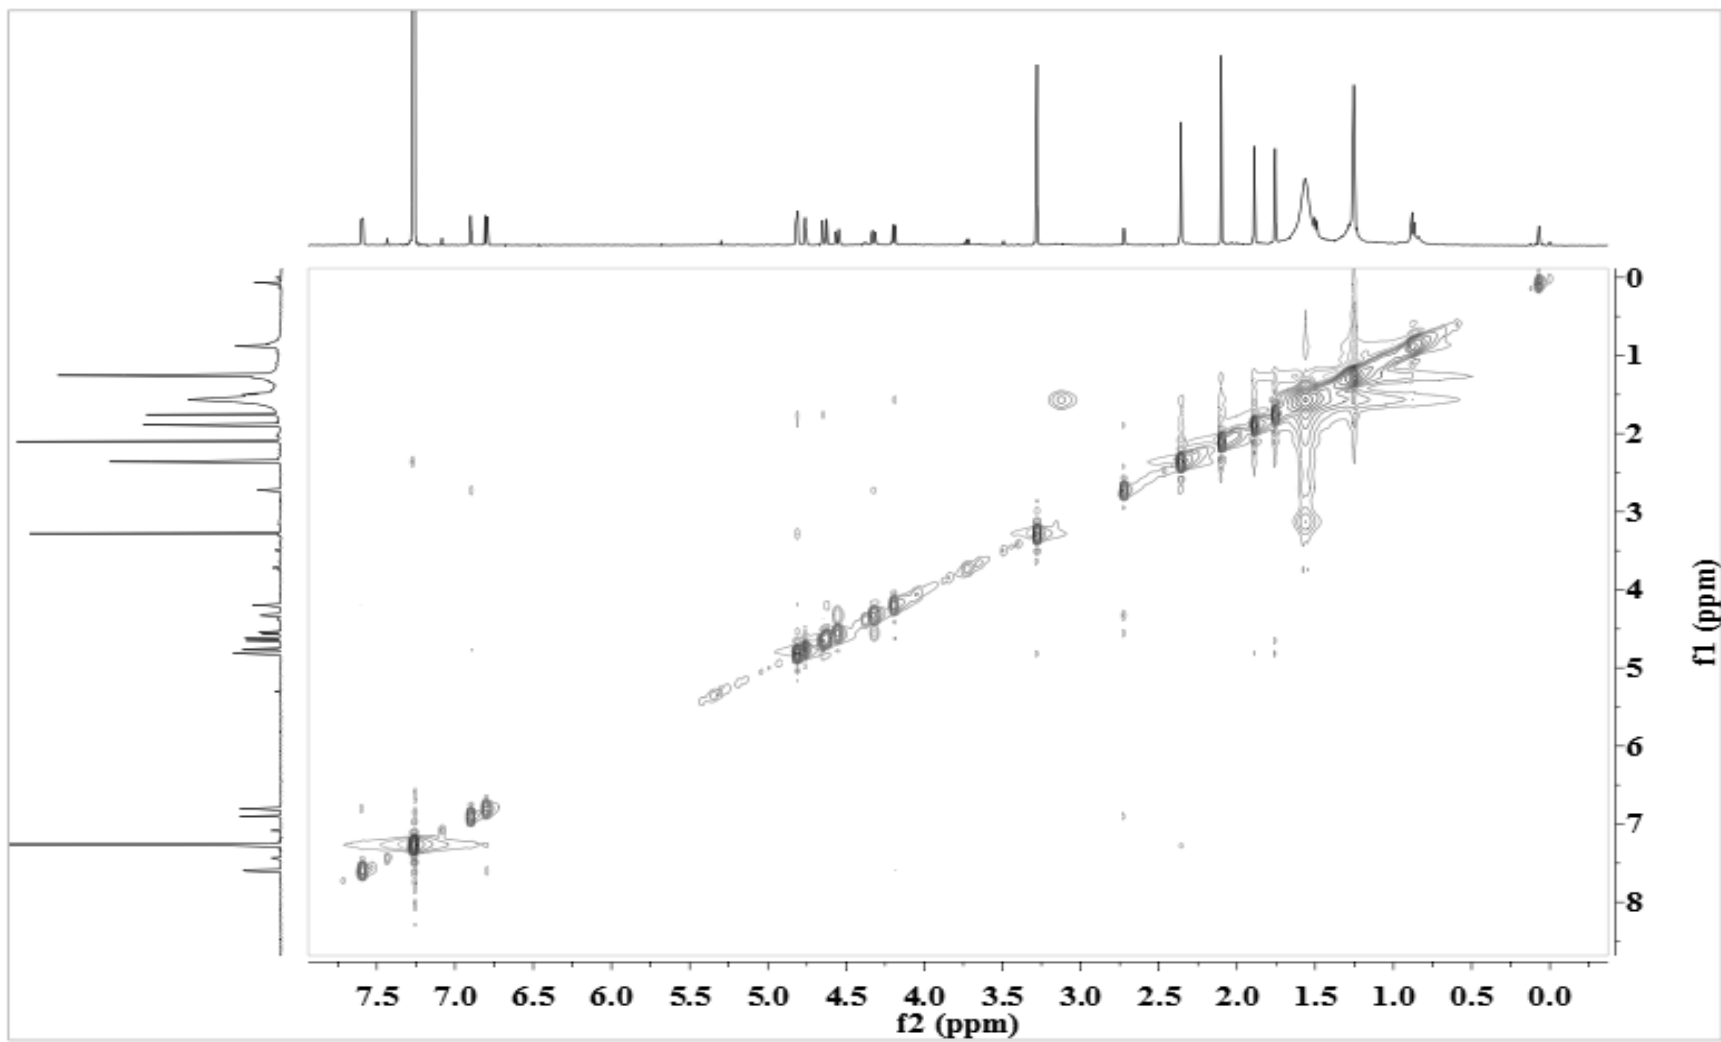

**Figure S16.** NOESY (CDCl<sub>3</sub>) spectrum of compound 2

20180326-Z-1\_180326152834 #74-76 RT: 0.60-0.61 AV: 3 NL: 1.28E5  
T: FTMS + p ESI Full ms [100.00-2000.00]

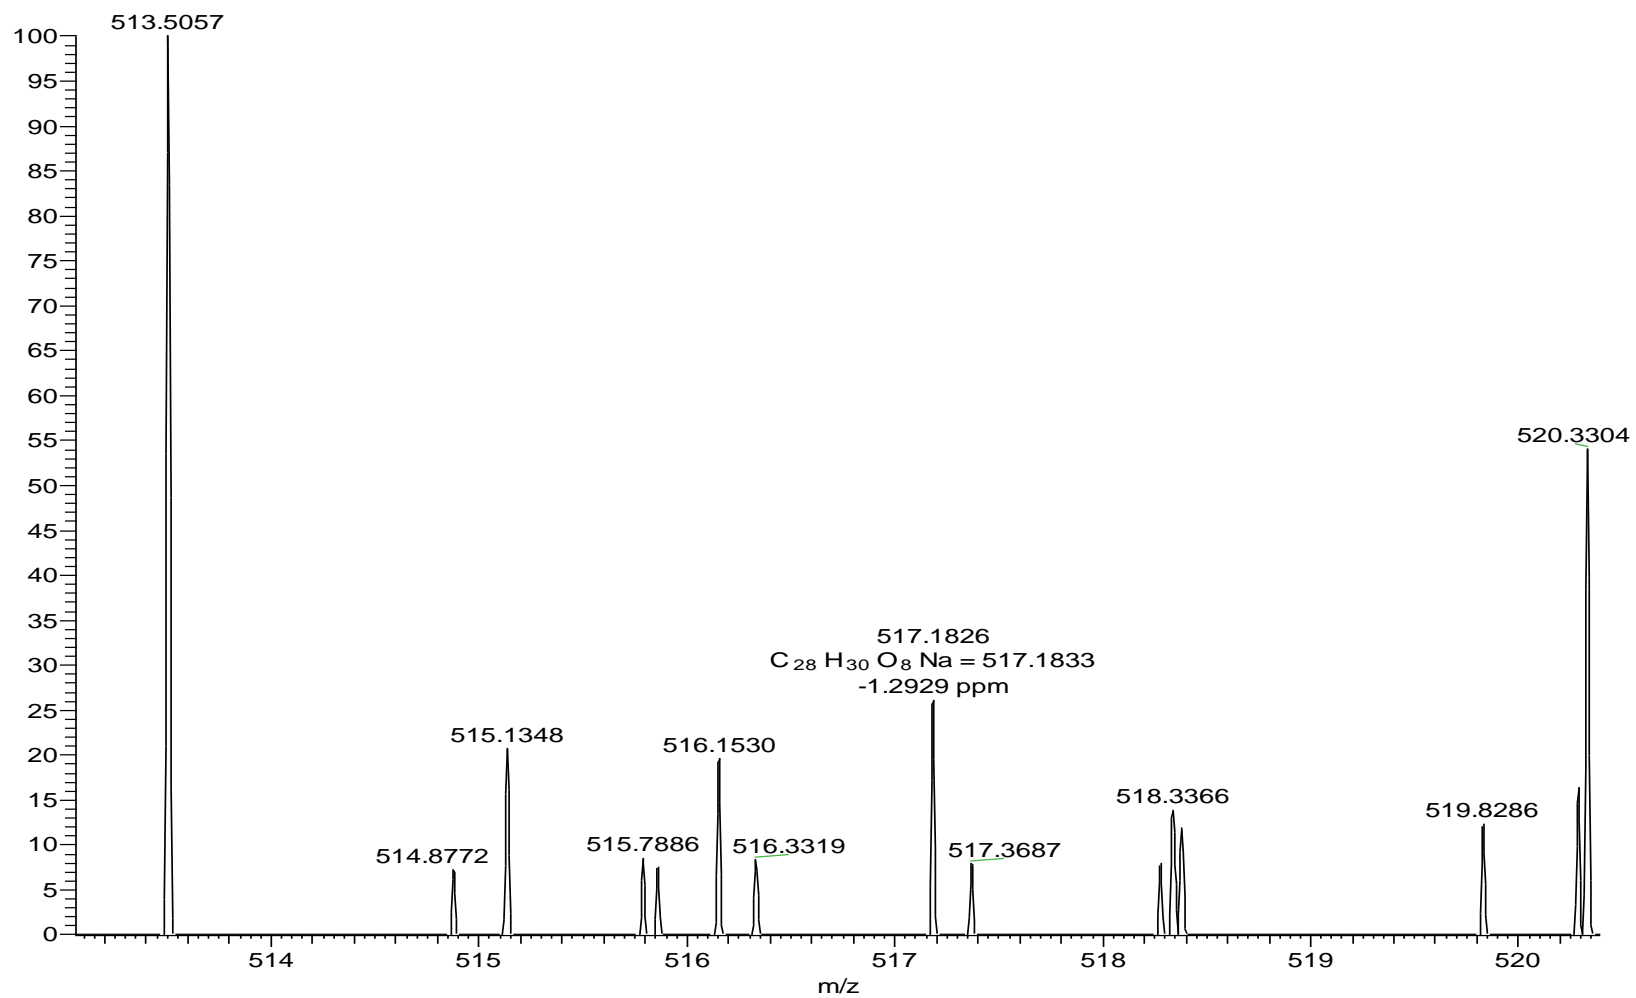

Figure S17. HRESIMS spectrum of compound 2

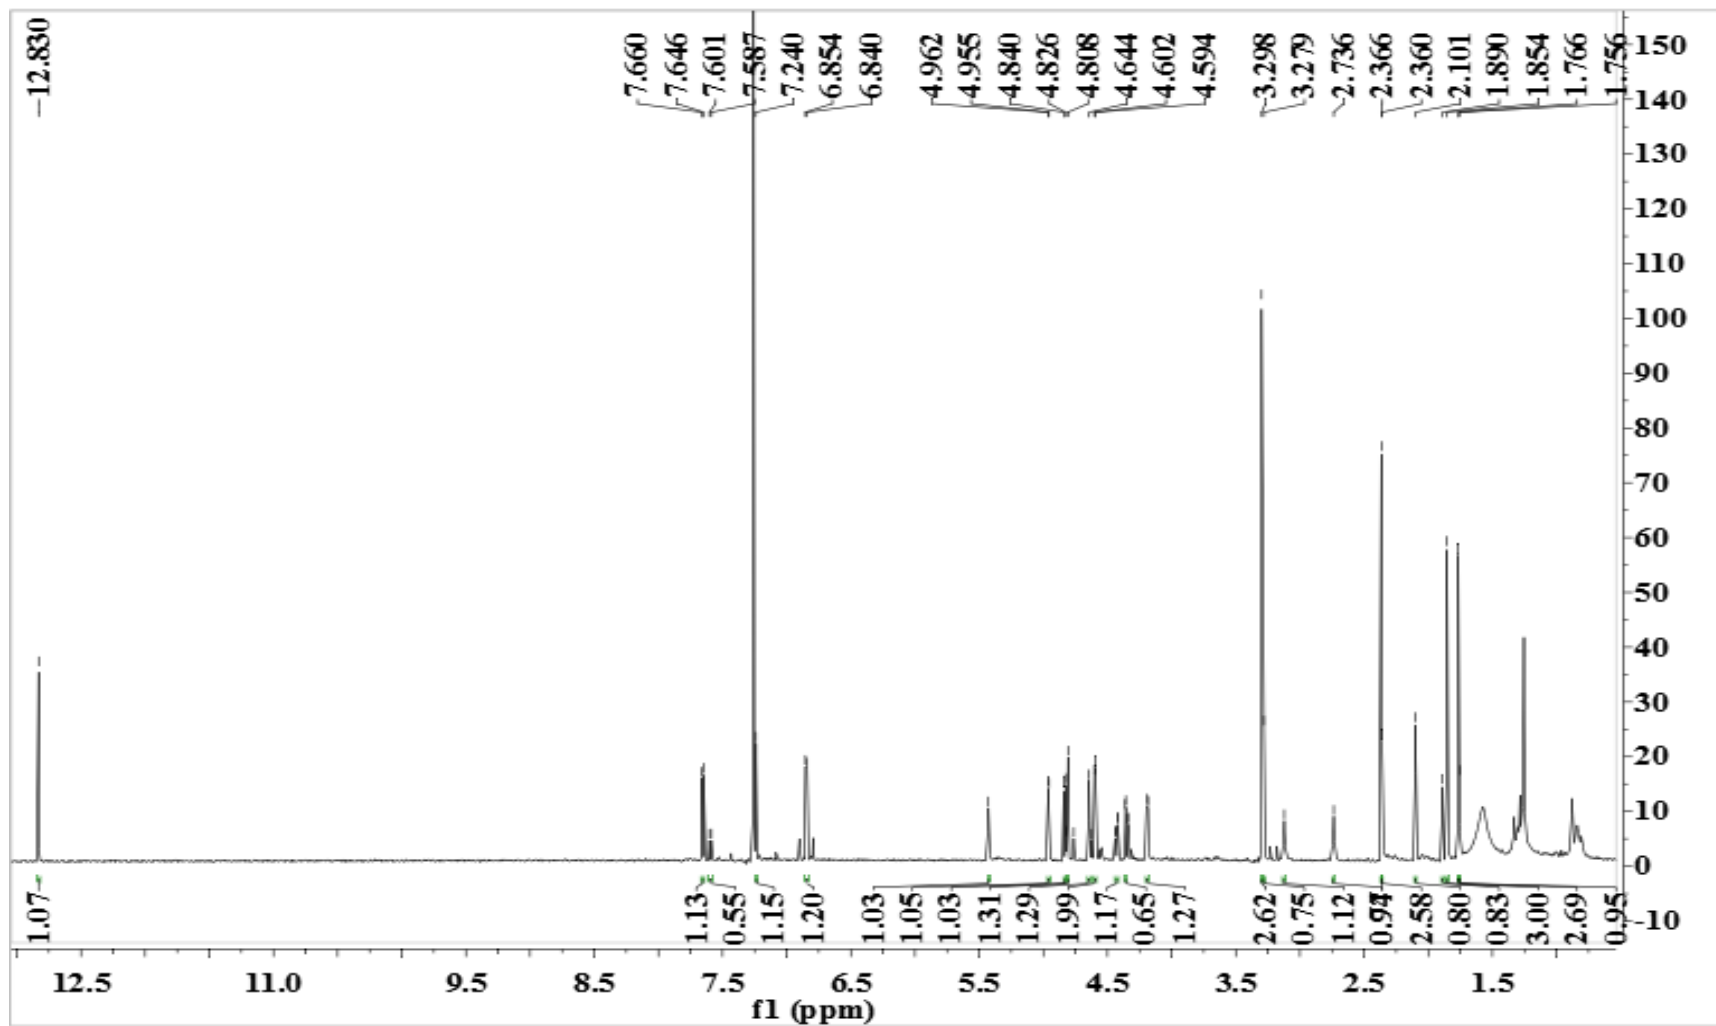

Figure S18. <sup>1</sup>H NMR (600 MHz, CDCl<sub>3</sub>) spectrum of compound 3

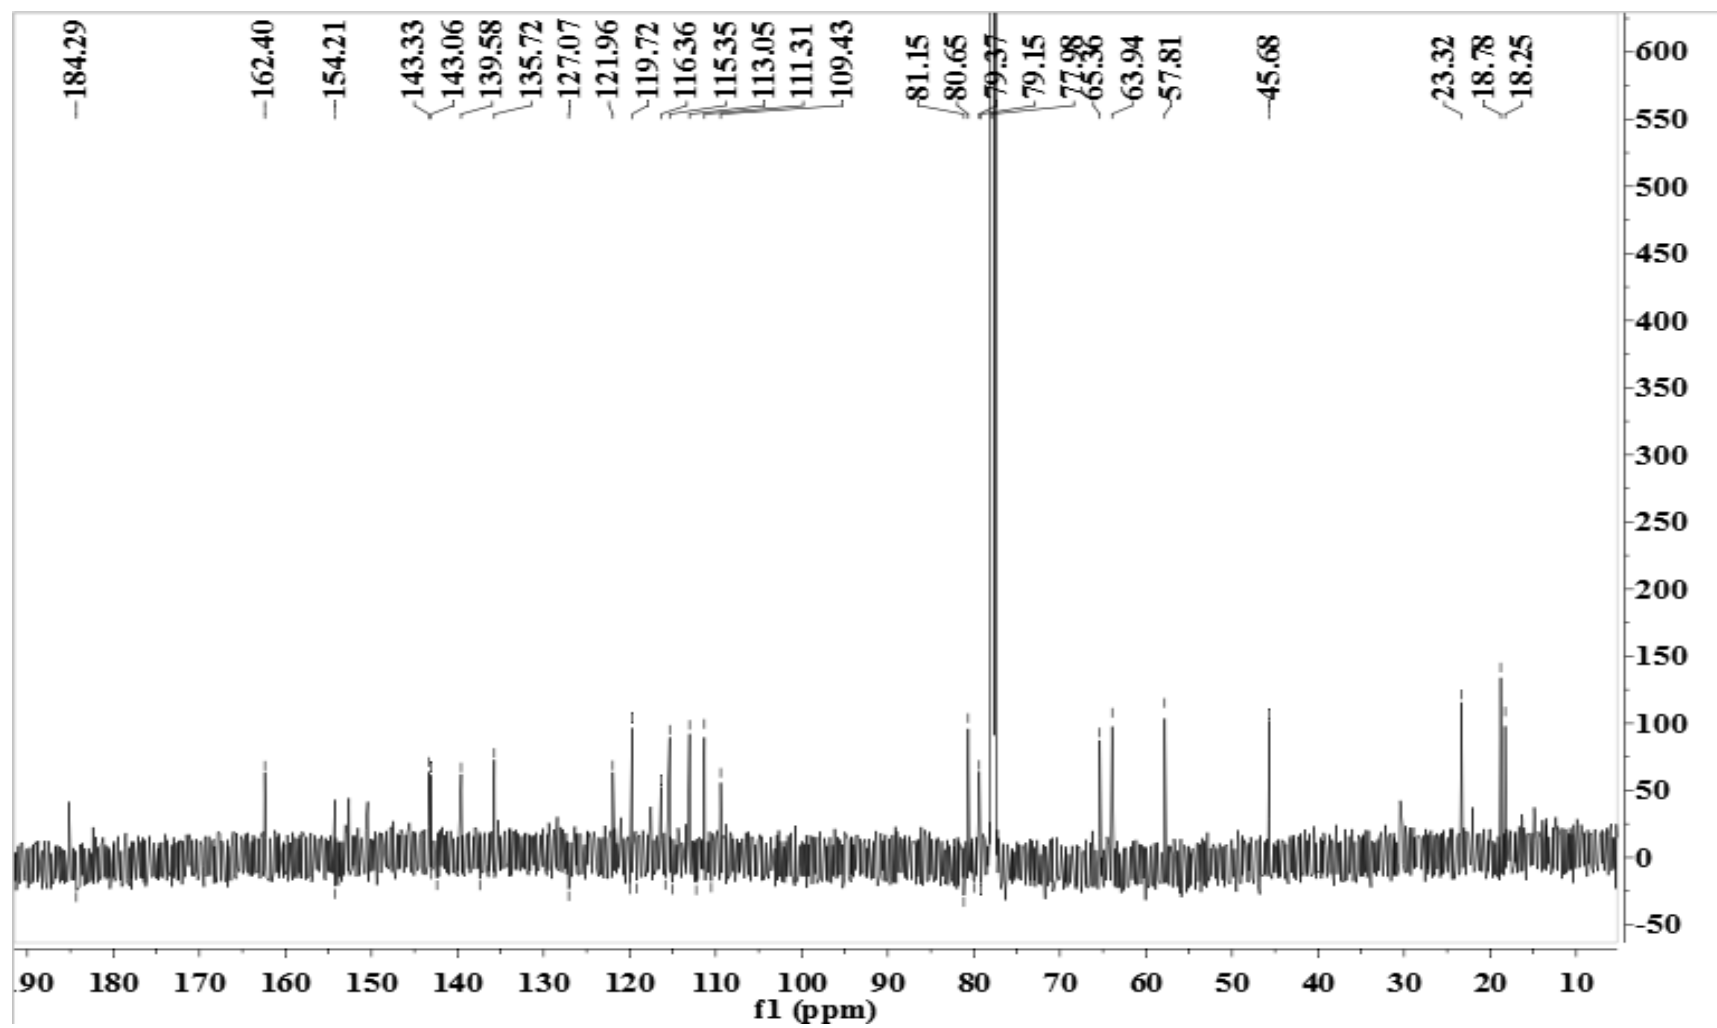

Figure S19.  $^{13}\text{C}$  NMR (150 MHz,  $\text{CDCl}_3$ ) spectrum of compound 3

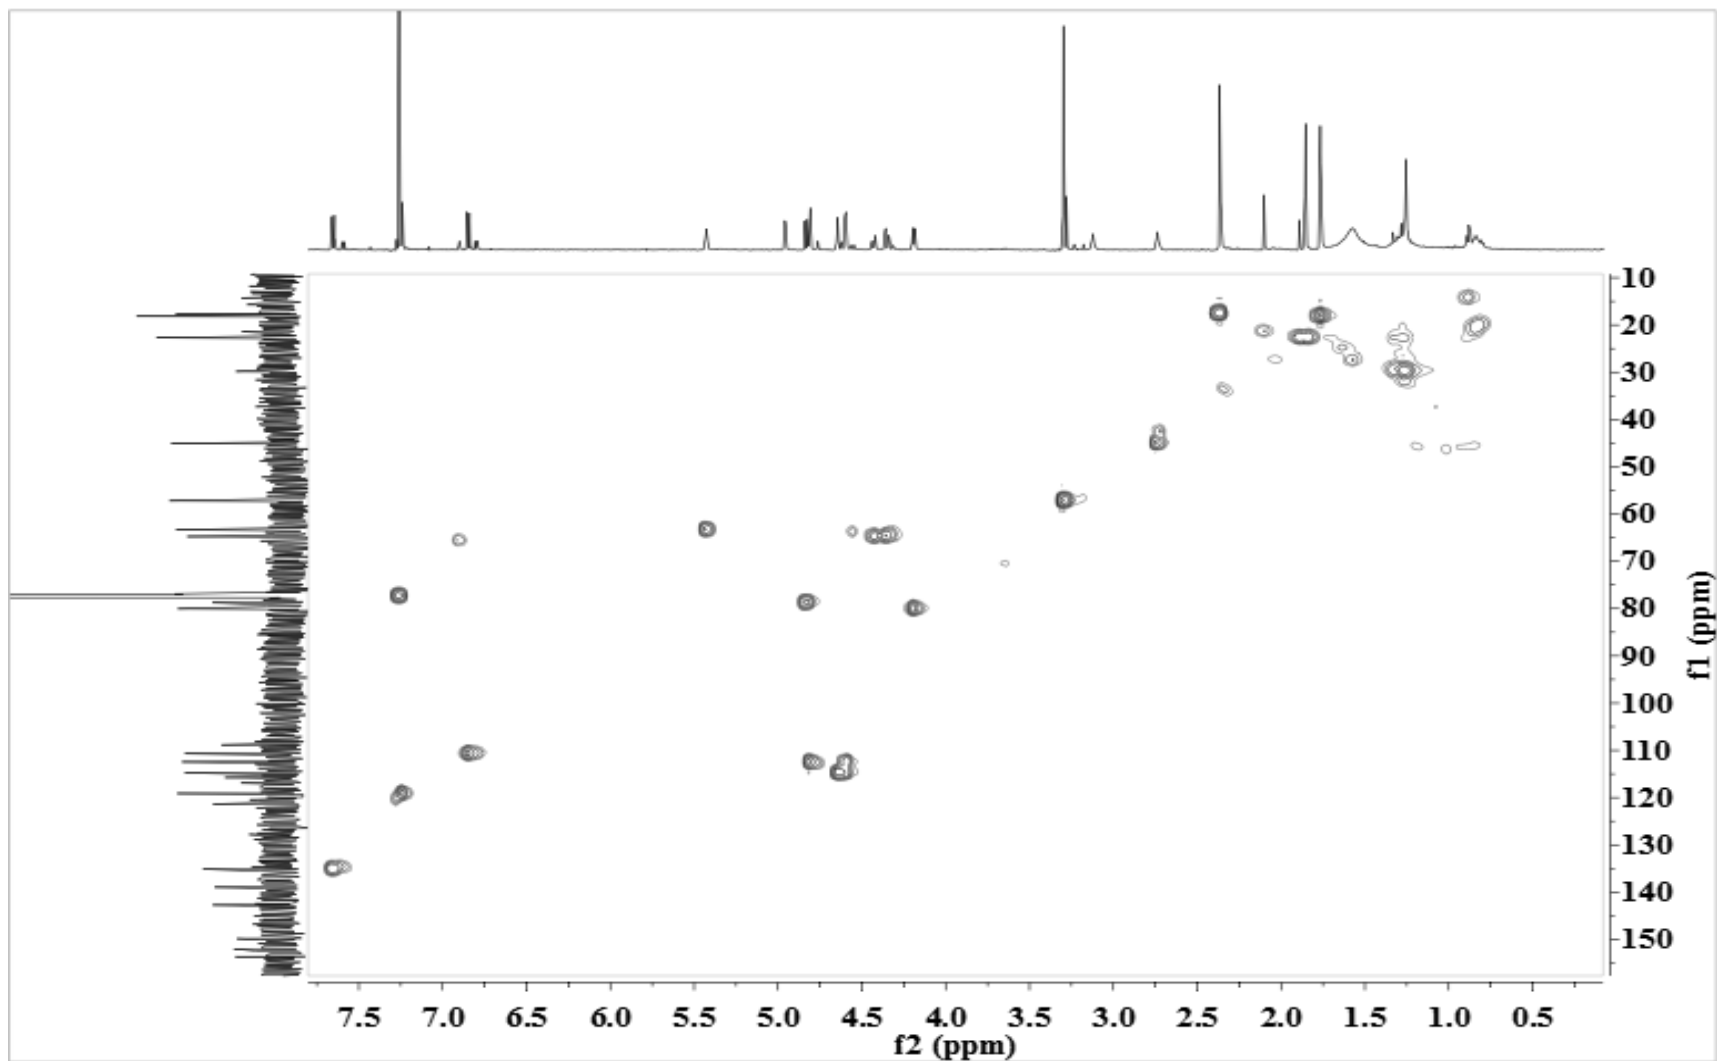

Figure S20. HSQC (CDCl<sub>3</sub>) spectrum of compound 3

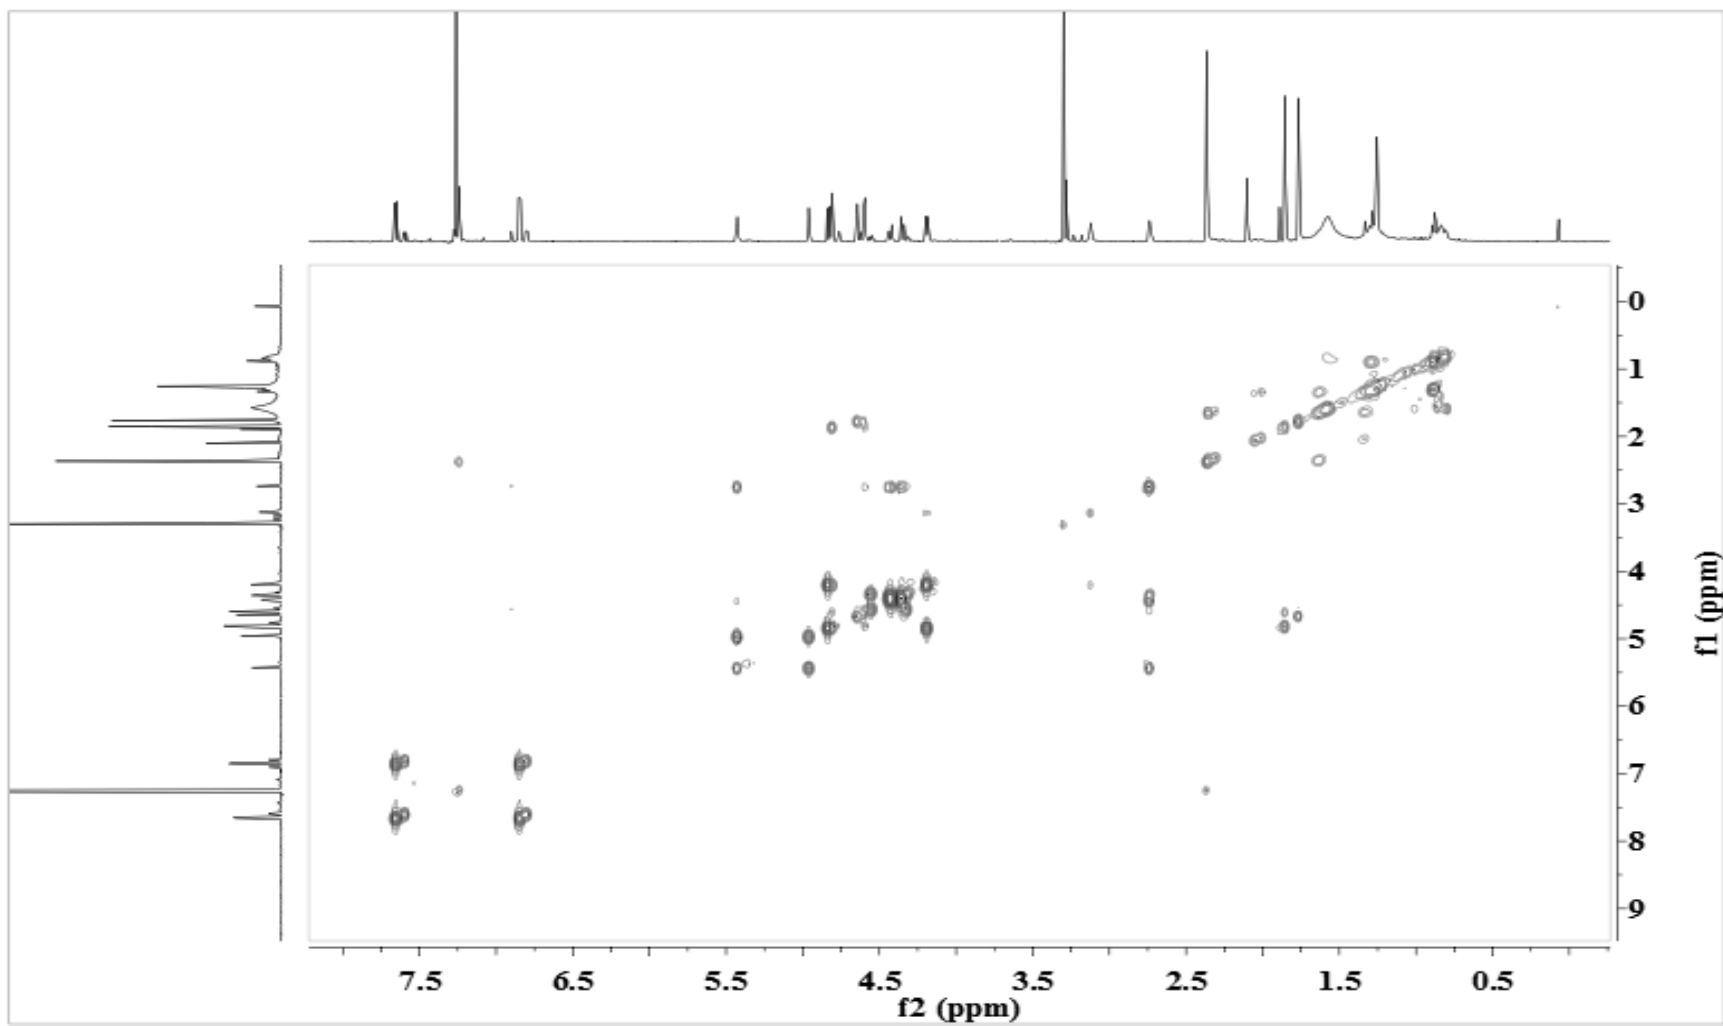

**Figure S21.**  $^1\text{H}$ - $^1\text{H}$  COSY ( $\text{CDCl}_3$ ) spectrum of compound 3

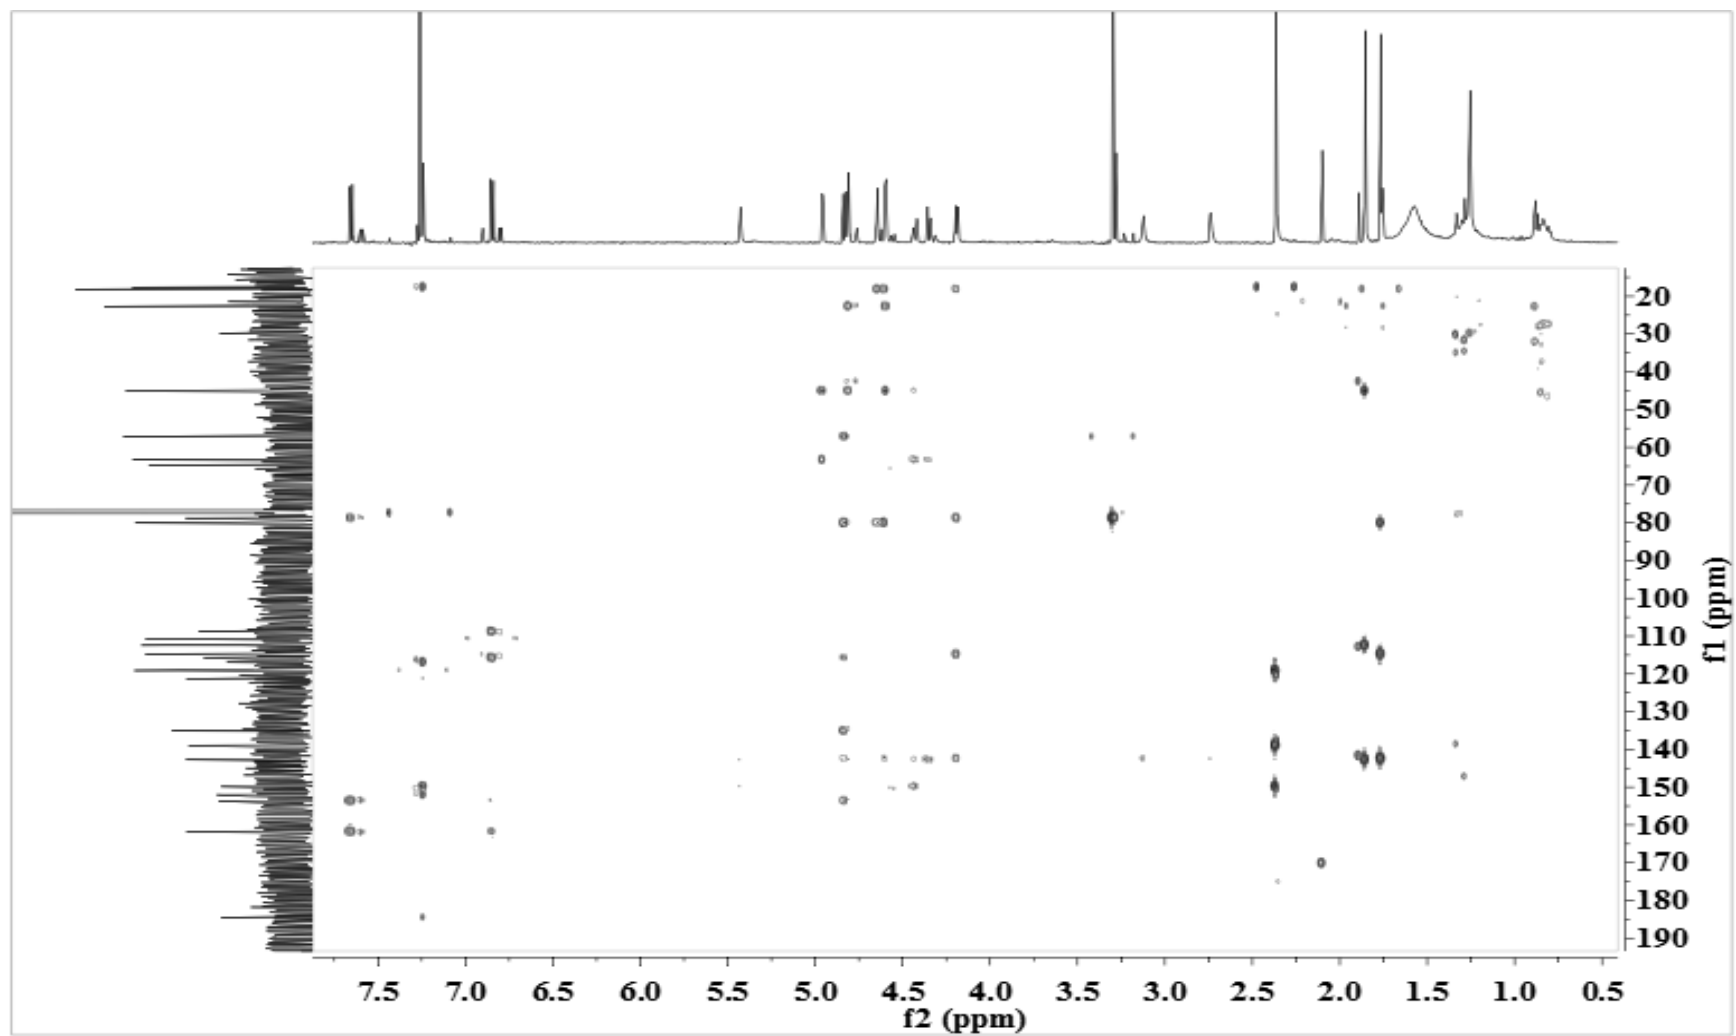

Figure S22. HMBC ( $\text{CDCl}_3$ ) spectrum of compound 3



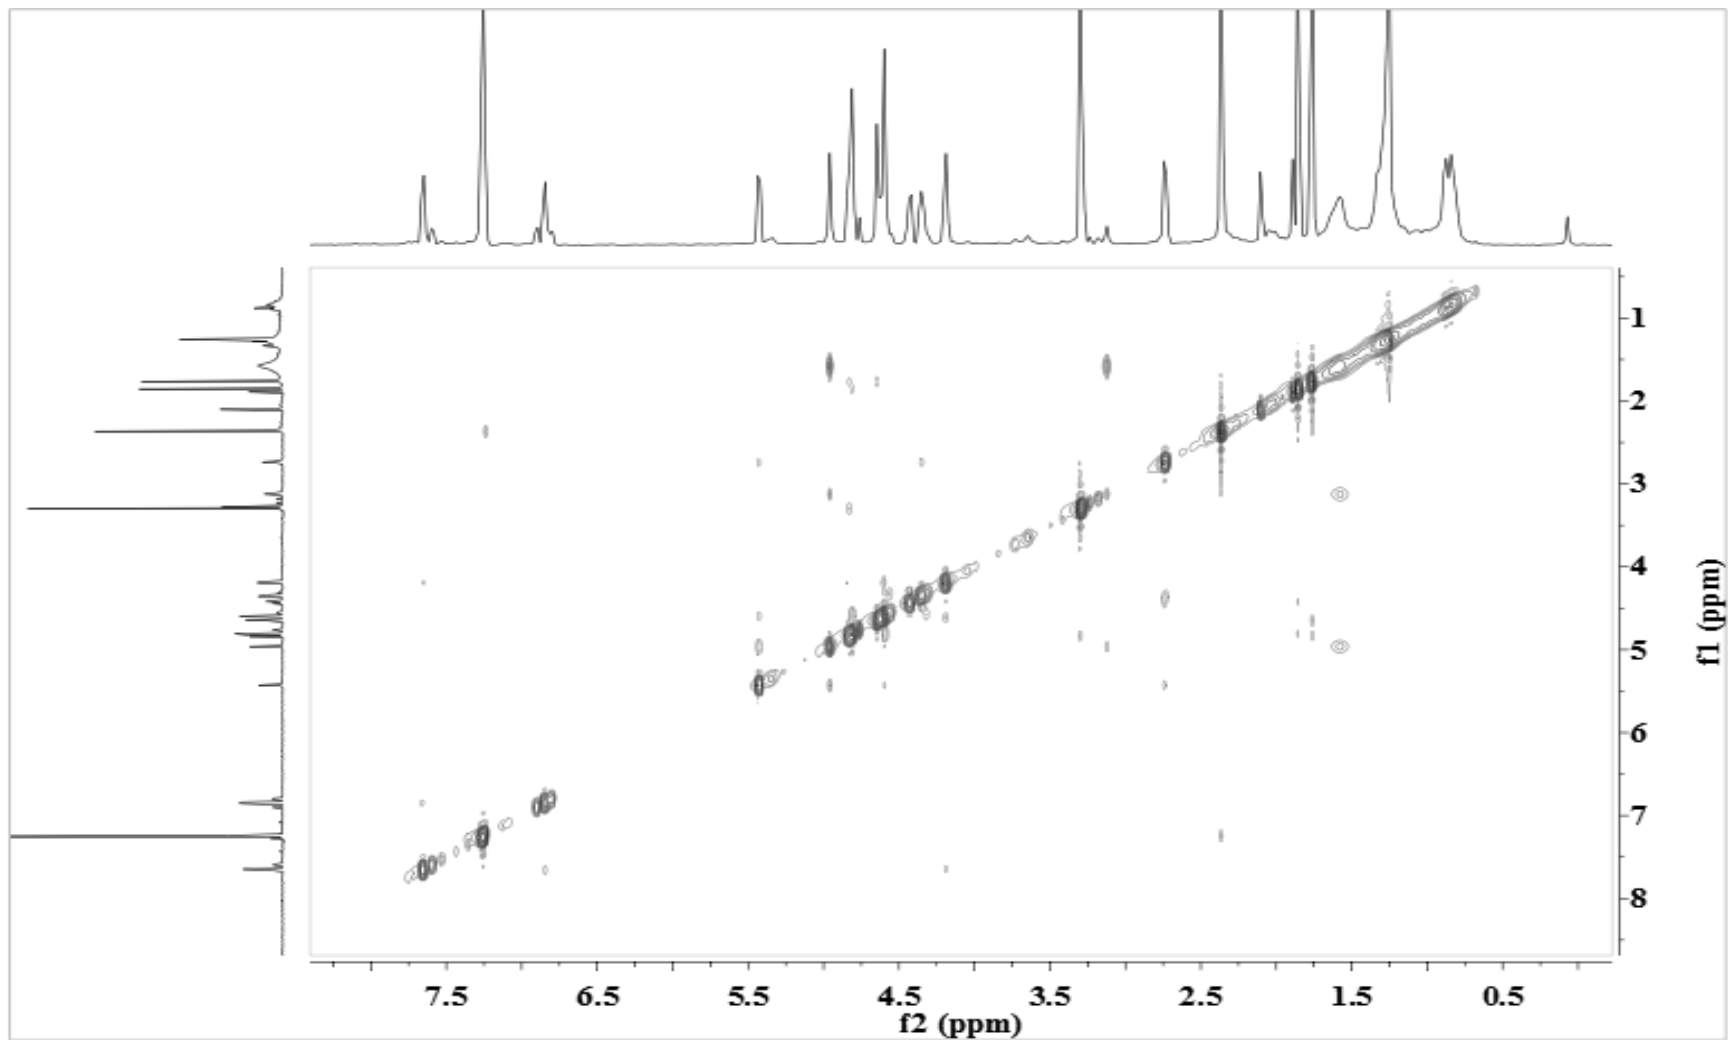

**Figure S23.** NOESY (CDCl<sub>3</sub>) spectrum of compound **3**

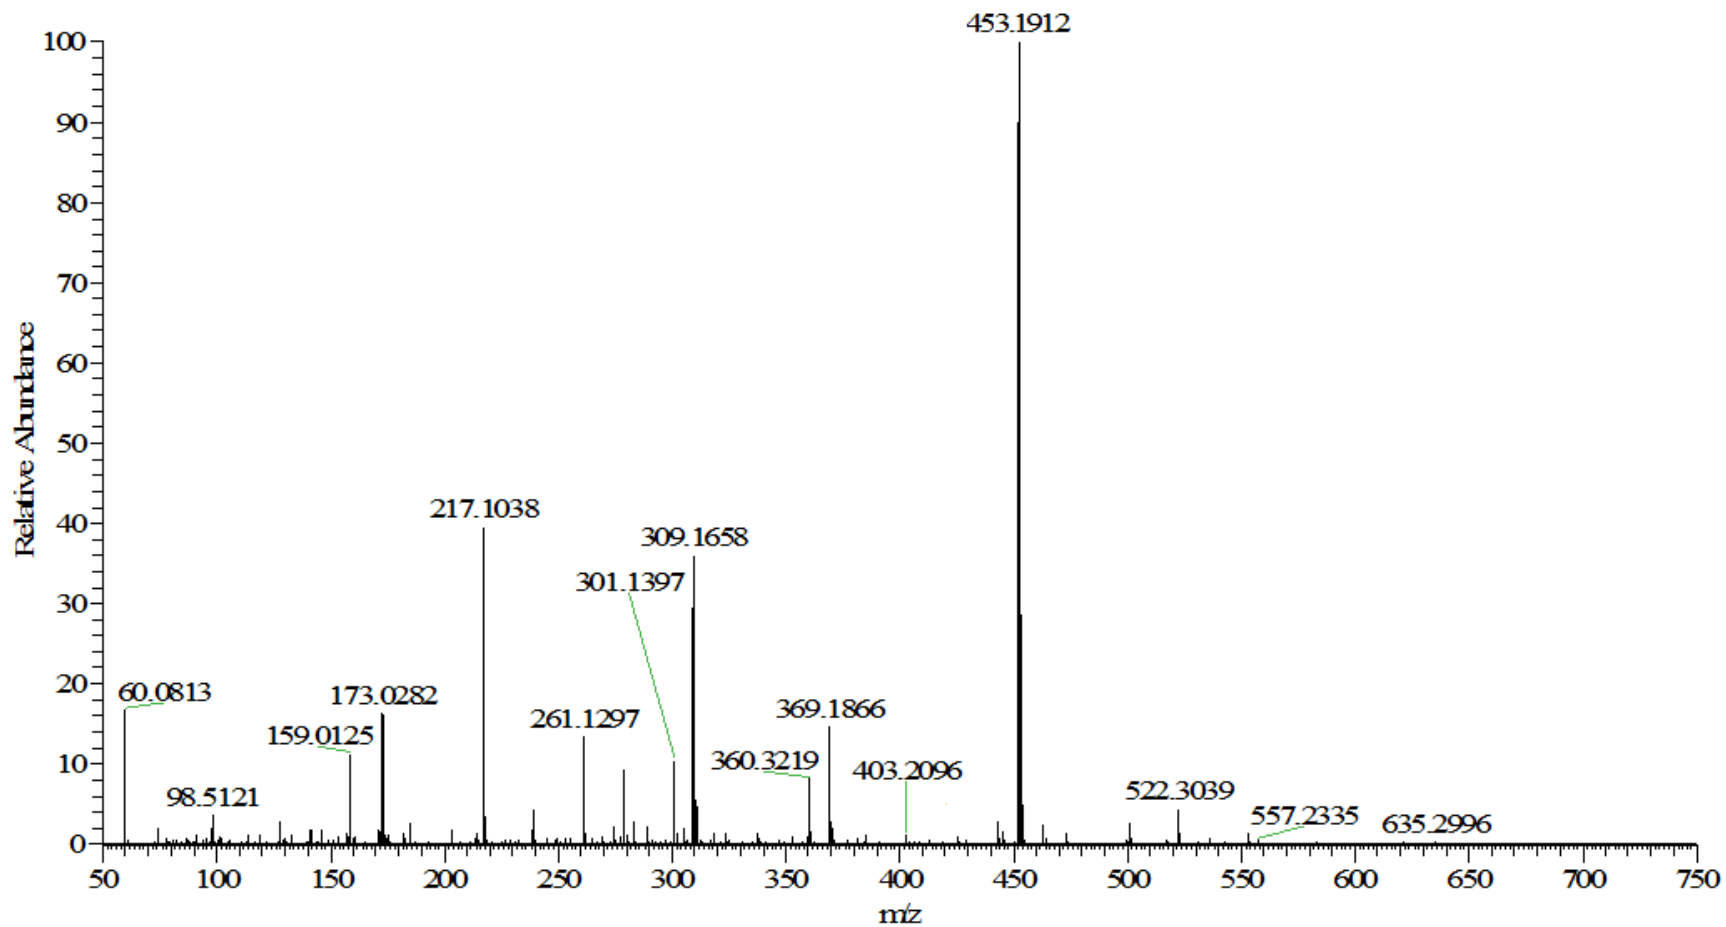

Figure S24. HRESIMS spectrum of compound 3
